1 **Human repair-related Schwann cells adopt functions of antigen-presenting cells *in vitro***

2

3 Jakob Berner<sup>1,3,\*</sup>, Tamara Weiss<sup>1,2,\*</sup>, Helena Sorger<sup>1,4</sup>, Fikret Rifatbegovic<sup>1</sup>, Max Kauer<sup>1</sup>,

4 Reinhard Windhager<sup>5</sup>, Alexander Dohnal<sup>1</sup>, Peter F. Ambros<sup>1</sup>, Inge M. Ambros<sup>1</sup>, Peter

5 Steinberger<sup>6</sup>, Sabine Taschner-Mandl<sup>1,#</sup>

6

7 **Affiliations:**

8 <sup>1</sup> CCRI, St. Anna Children's Cancer Research Institute, Vienna, Austria

9 <sup>2</sup> Department of Plastic, Reconstructive and Aesthetic Surgery, Medical University of Vienna

10 <sup>3</sup> St. Anna Children's Hospital, Vienna, Austria

11 <sup>4</sup> University for Veterinary Medicine, Vienna, Austria

12 <sup>5</sup> Department of Orthopedics and Trauma Surgery, Medical University of Vienna, Vienna, Austria

13 <sup>6</sup> Institute of Immunology, Medical University of Vienna, Vienna, Austria

14 \* These authors contributed equally

15 # Corresponding author

16

17 **Running title:** Antigen-presenting functions of human repair Schwann cells

18

19 **Corresponding author information:**

20 Sabine Taschner-Mandl

21 CCRI, St. Anna Children's Cancer Research Institute

22 Zimmermannplatz 10, 1090 Vienna, Austria

23 T: +43-1-40470-4050

24 E-mail: [sabine.taschner@ccri.at](mailto:sabine.taschner@ccri.at)

25

26 **Word count:**

27 Total: 6,990

28 Abstract: 250

29 Introduction: 943

30 Material and Methods: 2,351

31 Results: 1,781

32 Discussion: 1,665

33 **Key words:** Schwann cell, immunocompetence, PD-L1, immunoregulatory, inflammation,  
34 nerve injury, neuropathies, antigen presenting cell

35

36 **Main points:**

- 37 • Human repair-related Schwann cells (hrSC) function as professional antigen presenting
- 38 cells.
- 39 • HrSCs up-regulate PD-L1 upon pro-inflammatory IFN $\gamma$  stimulation.
- 40 • HrSCs hamper CD4 $^{+}$  and CD8 $^{+}$  T-cell activation.

41

42 **Graphical abstract**

43

### immunoregulatory features of human repair-related Schwann cells

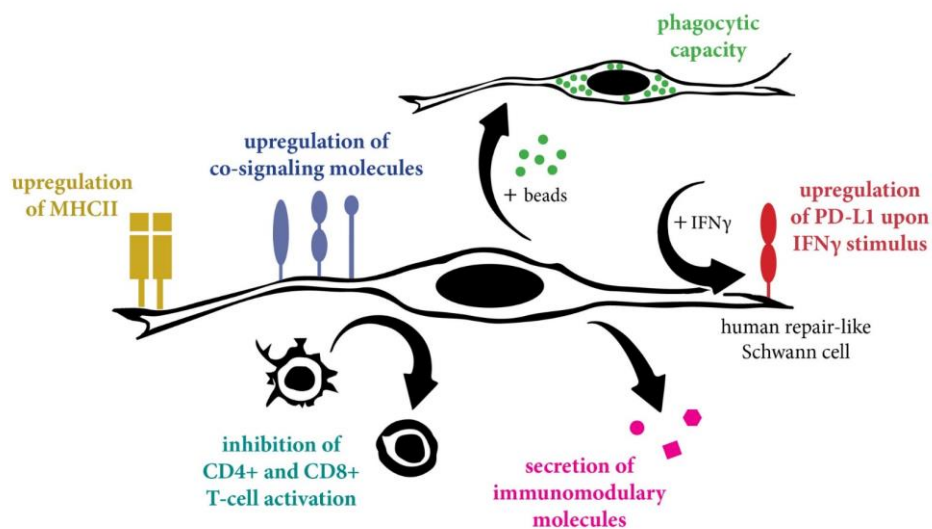

44

## 45 Abstract

46 The plastic potential of Schwann cells (SCs) is increasingly recognized to play a role after nerve  
47 injury and in diseases of the peripheral nervous system. In addition, reports on the interaction  
48 between SCs and immune cells indicate their involvement in inflammatory processes. However,  
49 data about the immunocompetence of human SCs are primarily derived from neuropathies and  
50 it is currently unknown whether SCs directly regulate an adaptive immune response after nerve  
51 injury.

52 Here, we performed a comprehensive analysis of the immunomodulatory capacities of human  
53 repair-related SCs (hrSCs), which recapitulate SC response to nerve injury *in vitro*. We used our  
54 previously established protocol for the culture of primary hrSCs from human peripheral nerves  
55 and analyzed the transcriptome, secretome, and cell surface proteins for signatures and  
56 markers relevant in innate and adaptive immunity, performed phagocytosis assays, and  
57 monitored T-cell subset activation in co-cultures with autologous human T-cells.

58 Our findings show that hrSCs are highly phagocytic, which is in line with high MHCII expression.  
59 In addition, hrSCs express co-regulatory molecules, such as CD40, CD80, B7H3, CD58, CD86,  
60 HVEM, release a plethora of chemoattractants, matrix remodelling proteins and pro- as well as  
61 anti-inflammatory cytokines, and upregulate the T-cell inhibiting PD-L1 molecule upon pro-  
62 inflammatory stimulation with IFN $\gamma$ . Furthermore, hrSC contact reduced the number and  
63 activation status of allogenic CD4 $^{+}$  and CD8 $^{+}$  T-cells.

64 This study demonstrates that hrSCs possess features and functions typical for professional  
65 antigen presenting cells *in vitro*, and suggest a new role of these cells as negative regulators of  
66 T-cell immunity during nerve regeneration.

## 67 Introduction

68 Schwann cells (SCs) are glial cells of the peripheral nervous system and possess capacities that  
69 go far beyond the preservation of axon integrity. Upon nerve injury, SCs undergo extensive  
70 morphological and expression changes and acquire distinct repair features in a process referred  
71 to as ‘adaptive cellular reprogramming’ (Jessen & Mirsky, 2016). In this dedicated repair cell  
72 state, SCs re-enter the cell cycle and execute specialized functions to coordinate the multi-step  
73 process of nerve regeneration, such as the recruitment of immune cells, the breakdown of  
74 myelin debris, remodeling of the extracellular matrix, and the expression of neurotrophic and  
75 neuritogenic factors for axon survival, regrowth, and guidance (Gomez-Sanchez et al., 2015;  
76 Jang et al., 2016; Jessen & Mirsky, 2016; Nocera & Jacob, 2020; Tofaris, Patterson, Jessen, &  
77 Mirsky, 2002; Weiss et al., 2016). Moreover, numerous studies support that the highly adaptive  
78 cellular state of SCs plays a role in pathological conditions such as neuropathies and tumor  
79 development (Azam & Pecot, 2016; Bunimovich, Keskinov, Shurin, & Shurin, 2017; Direder et  
80 al., 2021; Weiss et al., 2021). We have recently shown that tumor-associated SCs in  
81 neuroblastic tumors adopt a similar phenotype as upon nerve injury and exert anti-proliferative  
82 and pro-differentiating effects through the release of until then unknown neurotrophins, such  
83 as EGFL8 (Ambros et al., 1996; Crawford et al., 2001; Direder et al., 2021). As knowledge on the  
84 involvement of SCs during regeneration and pathologies is continuously expanding, their  
85 immunomodulatory potential gains increasing interest (Armati, Pollard, & Gatenby, 1990;  
86 Hörste, Hu, Hartung, Lehmann, & Kieseier, 2008; Zhang et al., 2020). SCs have been  
87 demonstrated as immune competent cells that contribute to inflammatory and hereditary  
88 neuropathies (Ydens et al., 2013). However, less is known about the impact of human SCs on  
89 the inflammatory processes during peripheral nerve regeneration (Bergsteinsdottir, Kingston,  
90 Mirsky, & Jessen, 1991; Rutkowski et al., 1999; Toews, Barrett, & Morell, 1998; Weiss et al.,  
91 2016).

92 Similar to any injury site in the body, injured nerves experience an early pro-inflammatory  
93 response by the influx of immune cells that is followed by termination of the immune response  
94 to allow tissue regeneration. Previous studies showed that SCs secrete a variety of cytokines  
95 and chemokines which attract monocytes and neutrophils to the site of nerve injury  
96 (Bergsteinsdottir et al., 1991; Rutkowski et al., 1999; Tofaris et al., 2002). Their expression could  
97 be partially mediated by axon derived molecules recognized by SCs via toll-like receptors (TLRs)

98 (Goethals, Ydens, Timmerman, & Janssens, 2010; Kaisho & Akira, 2000; Karanth, Yang, Yeh, &  
99 Richardson, 2006; Lee et al., 2006; Meyer Zu Horste et al., 2010; Meyer zu Hörste, Hu, Hartung,  
100 Lehmann, & Kieseier, 2008). Within injured nerves, recruited and/or tissue resident  
101 macrophages adapt a specialized regenerative phenotype with neuroprotective capacities and  
102 express proteins associated with an anti-inflammatory profile (Gaudet, Popovich, & Ramer,  
103 2011; La Fleur, Underwood, Rappolee, & Werb, 1996; Ydens et al., 2012). Of note, SCs might  
104 be involved in polarizing macrophages towards a regenerative phenotype, but so far, the  
105 underlying factors remain unknown (Stratton & Shah, 2016; Stratton et al., 2016).

106 SCs can also interact with T-cells by expressing major histocompatibility complex class II (MHCII)  
107 receptors and co-signaling molecules (Armati et al., 1990; Hörste et al., 2008; Murata &  
108 Dalakas, 2000). However, upregulation of MHCII on SCs was primarily reported in neuropathies  
109 (Mancardi et al., 1988; Meyer Zu Horste et al., 2010; Van Rhijn, Van den Berg, Bosboom, Otten,  
110 & Logtenberg, 2000) and upon treatment with IFN $\gamma$  (Armati et al., 1990; Lilje & Armati, 1997;  
111 Samuel, Mirsky, Grange, & Jessen, 1987), which is a potent inducer of MHCII expression in  
112 antigen presenting cells (APCs). In contrast, our previous research showed that human repair-  
113 related SCs highly upregulate MHCII in culture and within nerve explants independent of IFN $\gamma$   
114 (Weiss et al., 2016). Furthermore, these repair-related SCs expressed genes of co-signaling  
115 molecules, MHCII transcriptional co-activator *CIITA*, and other molecules involved in the  
116 antigen processing and presentation machinery (Weiss et al., 2016), suggesting a biological  
117 relevance of MHCII expressing SCs in response to injury.

118 APCs function as local modulators of T-cell response upon inflammatory stimulation. The  
119 outcome of this modulation is dependent on the expression of sets of co-stimulatory or co-  
120 inhibitory surface molecules recognized by T-cells together with MHCII. Indeed, rodent SCs  
121 could be induced to activate T-cells by presenting endogenous as well as exogenous antigens  
122 (Duan et al., 2007; Kingston et al., 1989; Spierings, De Boer, Zulianello, & Ottenhoff, 2000;  
123 Steinhoff & Kaufmann, 1988; Wekerle, Schwab, Linington, & Meyermann, 1986). Moreover, T-  
124 cell activation through MHCII expressing SCs has been associated with post-traumatic  
125 inflammation and neuropathic pain in diseased peripheral nerves of rodents (Hartlehnert et al.,  
126 2017). Hence, the SC function as non-professional APC has mainly focused on the promotion  
127 of T-cell activation resulting in (auto-) inflammatory or infectious neuropathies, rather than  
128 suppression of activated T-cells. The latter is executed by APCs to restore immune homeostasis  
129 and prevent auto-immunity to self-proteins. In line with a potential T-cell inhibiting function of

130 SCs, our previous transcriptomic analyses have indicated that primary human SCs express  
131 genes associated with T-cell suppression such as *PD-L1* and *DC-HIL* (Weiss et al., 2016).  
132 Based on the increasing body of studies supporting the immunocompetence of SCs and their  
133 recognized role in nerve injury and disease (Meyer zu Hörste et al., 2008; Weiss et al., 2021;  
134 Zhang et al., 2020), we here set out to investigate immunoregulatory features of human SCs in  
135 an injury condition. To this end, we cultured primary human SCs and performed phagocytosis  
136 assays, analyzed the secretion of immunomodulatory mediators, and profiled their repertoire  
137 of co-signaling molecules as well as upon TLR and inflammatory stimulation. We further  
138 assessed the ability of SCs to modulate T-cell activation and polarization *in vitro*.

139  
140

## 141 Methods

### 142 Human material

143 The collection and research use of human peripheral nerve tissues and human tumor specimen  
144 was conducted according to the guidelines of the Council for International Organizations of  
145 Medical Sciences and World Health Organisation and has been approved by the local ethics  
146 committees of the Medical University of Vienna (EK2281/2016 and 1216/2018). Informed  
147 consent has been obtained from all patients participating in this study.

148 Neuroblastoma cell lines and primary cultures are available upon request. Primary Schwann  
149 cell cultures and tumor tissues are limited materials and therefore cannot be provided.

150

### 151 Isolation of primary human Schwann cells

152 SCs were isolated, cultured and enriched as previously described (Weiss, Taschner-Mandl,  
153 Ambros, & Ambros, 2018). Briefly, peripheral nerves were cut into 2-3 cm pieces and nerve  
154 fascicles were pulled out of the surrounding epineural tissue. The isolated fascicles were cut  
155 into ~0.5 cm pieces and incubated in a digestion solution containing  $\alpha$ MEM GlutaMAX™  
156 (Gibco), 10% FCS (PAA), 1% Pen/strep (Pan Biotech), 1 mM sodium pyruvate (Pan Biotech), 25  
157 mM HEPES (Pan Biotech), 0.125% collagenase Type IV (Gibco), 1.25 U/mL Dispase II (Sigma-  
158 Aldrich) and 3 mM CaCl (Sigma-Aldrich) at 37 °C, for 20 h. The digested tissue was pelleted and  
159 resuspended in SC expansion medium (SCEM) containing MEM $\alpha$ , 1% Pen/Strep, 1 mM sodium  
160 pyruvate, 25 mM HEPES, 10 ng/mL hu FGF basic (PeproTech), 10 ng/mL hu Heregulin- $\beta$ 1

161 (PeproTech), 5 ng/mL hu PDGF-AA (PeproTech), 0.5% N2 supplement (Gibco), 2  $\mu$ M forskolin  
162 (Sigma-Aldrich) and 2% FCS. Cells were seeded in 0.01% Poly-L-lysine (PLL, Sigma-Aldrich) and  
163 4  $\mu$ g/ml laminin (Sigma-Aldrich) coated culture dishes. Half of the medium was changed twice  
164 a week. As passage 0 (p0) cultures consisted of SCs and fibroblast-like cells, SCs were enriched  
165 before experimentation, by exploiting their differential adhesion potential to plastic, described  
166 in (Weiss et al., 2018). As previously shown, human SCs adopt a repair-related phenotype in  
167 culture (Weiss et al., 2016) and SCs are referred to as human repair-related SCs (hrSC).

168

### 169 **Neuroblastoma cell lines**

170 The used neuroblastoma cell lines (NB cells) are derived from biopsies or surgical resection of  
171 aggressively behaving, high-risk neuroblastomas. In-house established, low passage NB cell  
172 lines STA-NB-6, 7, -10 and -15 as well as the cell lines, SH-SY5Y, IMR5 and CLB-Ma (kindly  
173 provided by Dr Valerie Combaret, Centre Leon Berard, France) (I M Ambros et al., 1997; Biedler,  
174 Helson, & Spengler, 1973; Biedler, Roffler-Tarlov, Schachner, & Freedman, 1978; Combaret et  
175 al., 1995; Fischer & Berthold, 2003; Momoi, Kennett, & Glick, 1980; Stock et al., 2008) were  
176 used for experimentation and cultured in MEM $\alpha$  GlutaMAX<sup>TM</sup>, 1% Pen/Strep, 1 mM sodium  
177 pyruvate, 25 mM HEPES and 10% FCS. NB cells are used in this study as model to reflect  
178 neuronal cells.

179

### 180 **Primary human T-cells**

181 For the T-cell isolation, a buffy coat was obtained from the Austrian Red Cross and diluted 1:4  
182 in 1x PBS. Density gradient centrifugation was performed by transferring the blood onto 20 mL  
183 Lymphoprep solution (StemCell Technologies) and centrifugation for 30 min at 400g at room  
184 temperature (RT) without breaks. Mononuclear cells were carefully removed from the  
185 interphase layer and transferred into 50 mL 1x PBS and centrifuged at 300g for 10 min. Then,  
186 the medium was removed and T-cells were isolated with the Pan T-cell Isolation Kit (Miltenyi  
187 Biotec) according to the manufacturer's protocol using magnetic activated cell sorting (MACS).  
188 Briefly, cells were counted and resuspended in 40  $\mu$ L of MACS buffer (PBS, pH 7.2, 0.5% bovine  
189 serum albumin (BSA), 2 mM EDTA) per  $10^7$  cells. For each 40  $\mu$ L, 10  $\mu$ L of PAN T-Cell Biotin  
190 Antibody Cocktail (Miltenyi Biotec) was added and incubated for 5 minutes at 4°C. Then 30  $\mu$ L  
191 of MACS buffer and 20  $\mu$ L of Pan T-Cell Microbead Cocktail was added per each 50  $\mu$ L solution  
192 and incubated for additional 10 min at 4°C. For the magnetic separation, MACS LS columns

193 (Miltenyi Biotec) were placed in the magnetic field of a MACS separator (Miltenyi Biotec) and  
194 the column was rinsed with 3 mL MACS buffer. The cell suspension was added and the flow-  
195 through containing the unlabelled, CD3 positive T-cells, was collected. Cells were frozen in  
196 Cryostor freezing medium (Biolife Solutions) and stored in liquid nitrogen until the day of the  
197 experiments.

198

## 199 **RNA Sequencing and data analysis**

200 RNA-sequencing datasets have been previously published and are available at the Gene  
201 expression omnibus (GEO) repository under the identifiers GSE94035 (MNC, n=5), GSE90711  
202 (SC, n=5), GSE90711 (NB primary cultures, n=5 over 3 patient cultures STA-NB-6, STA-NB-7 and  
203 STA-NB-15). RNA isolation, library preparation and sequencing on a Illumina Hiseq 2000  
204 platform were performed as previously described (Weiss et al., 2016, 2021). Short read  
205 sequencing data was quality checked using FASTQC  
206 (<http://www.bioinformatics.babraham.ac.uk/projects/fastqc>) and QoRTs (Hartley & Mullikin,  
207 2015) and then aligned to the human genome hs37d5 (<ftp://ftp.1000genomes.ebi.ac.uk/>) using  
208 the STAR aligner (Dobin et al., 2013) yielding a minimum of 11.6 million aligned reads in each  
209 sample. Further analysis was performed in R statistical environment using Bioconductor  
210 packages (Gentleman et al., 2004). Count statistics for Ensembl (GRCh37.75) genes were  
211 obtained by the “featureCounts” function (package “Rsubread”) and differential expression  
212 analysis was performed by edgeR and voom (Law, Chen, Shi, & Smyth, 2014; Ritchie et al.,  
213 2015). For differential gene expression analysis only genes passing a cpm (counts per gene per  
214 million reads in library) cut-off of 1 in more than two samples were included. All p-values were  
215 corrected for multiple testing by the Benjamini-Hochberg method. Genes with an adjusted q-  
216 value <0.05 and a log2 fold change > 1 ( $|\log_2FC| > 1$ ) were referred to as ‘significantly regulated’  
217 and used for functional annotation analysis via gene set enrichment analysis (GSEA) using  
218 MSigDB according to Subramanian, Tamayo, et al. (Subramanian et al., 2005) and Mootha,  
219 Lindgren, et al. (Mootha et al., 2003)

220

## 221 **Phagocytosis assay**

222  $5 \times 10^4$  enriched p1 hrSCs were seeded per well of an 8-well chamber slide (Ibidi) coated with  
223 PLL/laminin and cultured in SCEM. After 48 h, half of the medium was replaced with fresh SCEM  
224 containing 1  $\mu\text{m}$  big carboxylate-modified polystyrene, fluorescent yellow-green latex beads



225 (SIGMA-Aldrich) at a concentration of  $8 \times 10^6$  beads/well ( $\sim 100$  beads/cell) for 15 h at 37°C.  
226 Thereafter, cells were washed three times with 1x PBS and fixed with Roti-Histofix (Roth) for 10  
227 min at RT. Cells were stored at 4°C in 1x PBS until multi-color immunofluorescence staining was  
228 performed.

229

## 230 Immunofluorescence stainings

231 All antibody details, dilutions and incubation times are listed in **Supplementary Table 1**. If not  
232 stated otherwise, the staining procedure was performed on RT and a washing step (3 times  
233 with 1x PBS for 5 min) was performed after each antibody incubation step, except after  
234 permeabilization. For extracellular staining, grown cells were blocked with 1x PBS containing  
235 3% goat serum (DAKO) for 30 min at RT, followed by incubation with antibodies against  
236 extracellular targets diluted in 1x PBS containing 1% BSA (Sigma-Aldrich) and 1% goat serum.  
237 Cells were then incubated with secondary antibodies diluted in 1x PBS containing 1% BSA and  
238 1% goat serum. For permeabilization, cells were exposed to 1x PBS containing 1% BSA, 0.3%  
239 Triton-X (Sigma-Aldrich) and 3% goat serum for 10 min. Thereafter, cells were incubated with  
240 primary antibodies against intracellular targets diluted in 1x PBS containing 1% BSA, 0.1%  
241 Triton-X and 1% goat serum, followed by incubation with secondary antibodies diluted in 1X  
242 PBS containing 1% BSA, 0.1% Triton-X and 1% goat serum. Afterwards, 2  $\mu\text{g}/\text{mL}$  4',6-Diamidin-  
243 2-phenylindol (DAPI, Sigma-Aldrich) in 1X PBS was added for 2 min followed by a final washing  
244 step. Cells were embedded in Fluoromount-G<sup>TM</sup> mounting medium (Southern Biotech) and  
245 stored at 4°C. Images were taken with a confocal laser scanning microscope (Leica  
246 Microsystems, TCS SP8X) using Leica application suite X version 1.8.1.13759 or LAS AF Lite  
247 software. Confocal images are depicted as maximum projection of total z-stacks and brightness  
248 and contrast were adjusted in a homogenous manner using the Leica LAS AF software.

249

## 250 FACS characterization of hrSCs

251 All antibodies used for flow cytometry stainings are listed in **Supplementary Table 1**. If not stated  
252 otherwise, the staining procedure was performed on 4°C. For all phenotyping experiments,  
253 cells were cultured in duplicates in each condition. HrSCs were cultured in the presence of IFN $\gamma$   
254 ( $10^3$  U/mL, Bio-Techne Ltd.), LPS (10 ng/mL, Sigma-Aldrich), Poly:IC (2  $\mu\text{g}/\text{mL}$ , Bio-Techne Ltd.)  
255 cross-linked CD40L (500 ng/mL, Bio-Techne Ltd.) and IL-1 $\beta$  ( $10^4$  U/mL Bio-Techne Ltd.) for 24 h.  
256 Cells were harvested with Accutase (Sigma-Aldrich) and transferred into FACS tubes containing

257 200  $\mu$ L FACS buffer (0.1% BSA and 0.05% natrium acides in 1x PBS). Cells were washed once  
258 with FACS buffer at 1200rpm for 5 min, resuspended in 50  $\mu$ L FACS buffer and incubated with  
259 50  $\mu$ L of an antibody master mix in FACS buffer for 30 min in the dark. Then, cells were washed  
260 with FACS buffer and resuspended in 100  $\mu$ L of Cytofix/Cytoperm solution (BD Biosciences),  
261 incubated for 20 min, and again washed with BD 1x perm buffer (BD Biosciences). Next, cells  
262 were resuspended in 100  $\mu$ L 1x perm buffer containing the S100 antibody and incubated for 30  
263 min in the dark. Cells were then washed in 1x perm buffer and resuspended in 100  $\mu$ L 1x perm  
264 buffer with the secondary antibody for 20 min. After a washing step in 1x perm buffer, cells  
265 were washed with FACS buffer and resuspended in 100  $\mu$ L FACS buffer. All samples were  
266 measured with a FACSFortessa flow cytometer equipped with 5 lasers (355, 405, 488, 561 and  
267 640 nm) and the FACSDiva software version 8.0 (BD Biosciences) was used.

268

### 269 T-cell proliferation assay

270 For all T-cell experiments, hrSCs and freshly thawed human CD3<sup>+</sup> T-cells were used in various  
271 conditions. For IFN $\gamma$  stimulation, hrSCs were cultured in the presence of 10<sup>3</sup> U/mL IFN $\gamma$  for 24  
272 h prior to the T-cell co-culture experiments. For co-culture, p1 hrSCs were harvested, counted  
273 and seeded at 4x10<sup>4</sup> cells per 96 well plates in duplicates. T-cells were thawed, washed once  
274 with 1XPBS and centrifuged at 300g for 7 min at RT. Cells were counted and labelled with CFSE  
275 (Thermo Fisher) at 1  $\mu$ L/10<sup>7</sup> cells for 10 min at 37°C. Thereafter, 1 mL FCS buffer was added for  
276 2 min at RT and then washed with  $\alpha$ MEM at 300g for 7 min. Then, cells were FACS sorted for  
277 intact cells using a FSC vs SSC gate using the FACS Aria instrument (BD Bioscience). The obtained  
278 cells were washed with  $\alpha$ MEM at 300g for 7 min, counted and 1x10<sup>5</sup> cells were seeded to the  
279 hrSCs (co-culture) or cultured alone (controls) in 96 well plates. For the T-cell stimulation, 0.25  
280  $\mu$ L of anti-CD3/CD28 beads (Gibco) were added. Culture medium containing CD3/CD28 beads  
281 was thoroughly replenished every 3 days by one half.

282 Cells were analysed via flow cytometry at different time points, i.e. at day 2, 4 and 10.  
283 Therefore, cells were harvested with Accutase and washed once with FACS buffer. All  
284 antibodies used for flow cytometry stainings are listed in **Supplementary Table 1**. Extracellular  
285 staining was performed with 50  $\mu$ L of antibody mix containing all extracellular antibodies (CD3-  
286 FITC, CD4-PerCP, CD8APC-Cy7, CD25-PE-Cy7) in 50  $\mu$ L of FACS buffer for 30 min at 4°C. Cells  
287 were washed and incubated in Fix/Perm solution (Thermo Fisher) at 4°C for 30 min. For the  
288 permeabilization, 1x perm buffer (Thermo Fisher) was added and cells were centrifuged at 300g

289 for 7 min. Then, the supernatant was discarded and the S100 antibody for intracellular staining  
290 was added in 100  $\mu$ L 1x perm buffer and incubated for 20 min at RT in the dark. After this, cells  
291 were washed once with 1x perm buffer, once with FACS buffer and resuspended in 100  $\mu$ L FACS  
292 buffer. For exact quantification of absolute cell numbers, 10  $\mu$ L AccuCheck Counting Beads  
293 (LifeTechnologies) were added to each sample prior to FACS analysis at a FACSFortessa flow  
294 cytometer. For data analysis, FACSDiva software version 8.0 was used. Gating for CD4<sup>+</sup> Th  
295 subsets was performed in accordance to Mahnke *et al.* 2013 (Mahnke, Beddall, & Roederer,  
296 2013).

297

## 298 **Protein array**

299 The RayBio G-Series Human Cytokine Antibody Array 4000 Kit (RayBiotech Inc.) was used to  
300 assay secretomes of cell supernatants pooled from 2 independent experiments each from hrSC  
301 (n=5), hrSCs co-cultured with 5 different NB cell cultures (n=5) or NB cell cultures alone (n=5).  
302 A total of 274 factors were evaluated (for a complete list of factors, refer to  
303 <https://www.raybiotech.com/human-cytokine-array-g4000-4/>). Arrays were processed  
304 according to the manufacturer's instructions. Briefly, protein array membranes were blocked  
305 with Blocking Buffer (RayBiotech Inc.) for 30 min at RT. Membranes were then incubated with  
306 100  $\mu$ L of undiluted sample for 2 h. After extensive washing with Wash Buffer I and II  
307 (RayBiotech Inc.) to remove unbound materials, the membranes were incubated with biotin-  
308 conjugated antibodies for 2 h at RT. The membranes were then washed and incubated with  
309 streptavidin-fluorescein, again for 2 hours at RT, followed by final washing steps. Finally,  
310 fluorescence signals were obtained with the GenePix 4000 array scanner (Molecular Devices)  
311 using the green channel (Cy3) at an excitation frequency of 532 nm and 700 PMT. The image  
312 files generated in this way were aligned to respective .gal files (RayBiotech) and Gene Pix Pro 7  
313 (Molecular Devices) was used to create .gpr files. Each spot was manually inspected on the .gpr  
314 file images to ensure accuracy. After background correction and normalization to the internal  
315 control, the mean fluorescence intensity (MFI) values were combined for all cell lines and  
316 proteins that were differentially expressed ( $q < 0.05$ ) between hrSCs and hrSCs in co-cultures,  
317 compared to neuronal cells as controls, were selected for visualization using the QluCore Omics  
318 Explorer V3.1 software.

319

## 320 **Quantification and statistical analysis**

321 If not mentioned otherwise, statistical analysis was performed with R version 3.4.2 within the  
322 R studio interface including publicly available packages CRAN, GGLOT2, GGBEESWARM and  
323 RESHAPE. For pair-wise comparison paired t-tests were used, for multiple comparisons two-  
324 way ANOVA using a post-hoc Holm p value correction was used. P values of less than 0.05 were  
325 considered significant and displayed as \*, p values of less than 0.01 were displayed as \*\*, p  
326 values of less than 0.001 were displayed as \*\*\*.

327

## 328 **Data and code availability**

329 No original code has been generated in this study. Original/source data for all figures and  
330 supplementary figures are available upon request. RNA-sequencing data are available at the  
331 Gene Expression Omnibus (GEO) repository ([Home - GEO - NCBI \(nih.gov\)](https://www.ncbi.nlm.nih.gov/geo/)) under the identifier  
332 GSE94A035, GSE90711 and GSE90711.

333

## 334 **Results**

### 335 **Human repair-related Schwann cells show a phagocytic capacity**

336 APCs are characterized by their phagocytic ability of exogenous material to process and present  
337 antigens via MHCII. To evaluate whether human SCs can take-up material different from myelin,  
338 we applied our previously established protocol for the culture of primary SCs from human  
339 peripheral nerves (Weiss et al., 2018). As human SCs possess a repair-like phenotype and  
340 perform repair-associated functions in culture (Weiss et al., 2016), they are referred to as  
341 human repair-related SCs (hrSCs) in the following. The cultured hrSCs showed the typical  
342 spindle-shaped morphology with a swirled parallel alignment (**Fig. 1A**) and were characterized  
343 by immunostainings for the SC marker NGFR (also known as TNFR16 or p75<sup>NTR</sup>) (**Fig. 1B**). The co-  
344 staining for vimentin, an intermediate filament expressed by SCs and fibroblasts, visualized a  
345 straight filament network within the long hrSC processes and a more branched appearance in  
346 fibroblasts (**Fig. 1B**). To obtain information about their phagocytic capacity, we challenged the  
347 hrSCs with green fluorescent latex beads (1 µm diameter) for 15 hours and stained the cultures  
348 for NGFR and vimentin. 3D confocal image analysis demonstrated that hrSCs were able to  
349 phagocytose the beads and to accumulate them within the cell body (**Fig. 1C**).

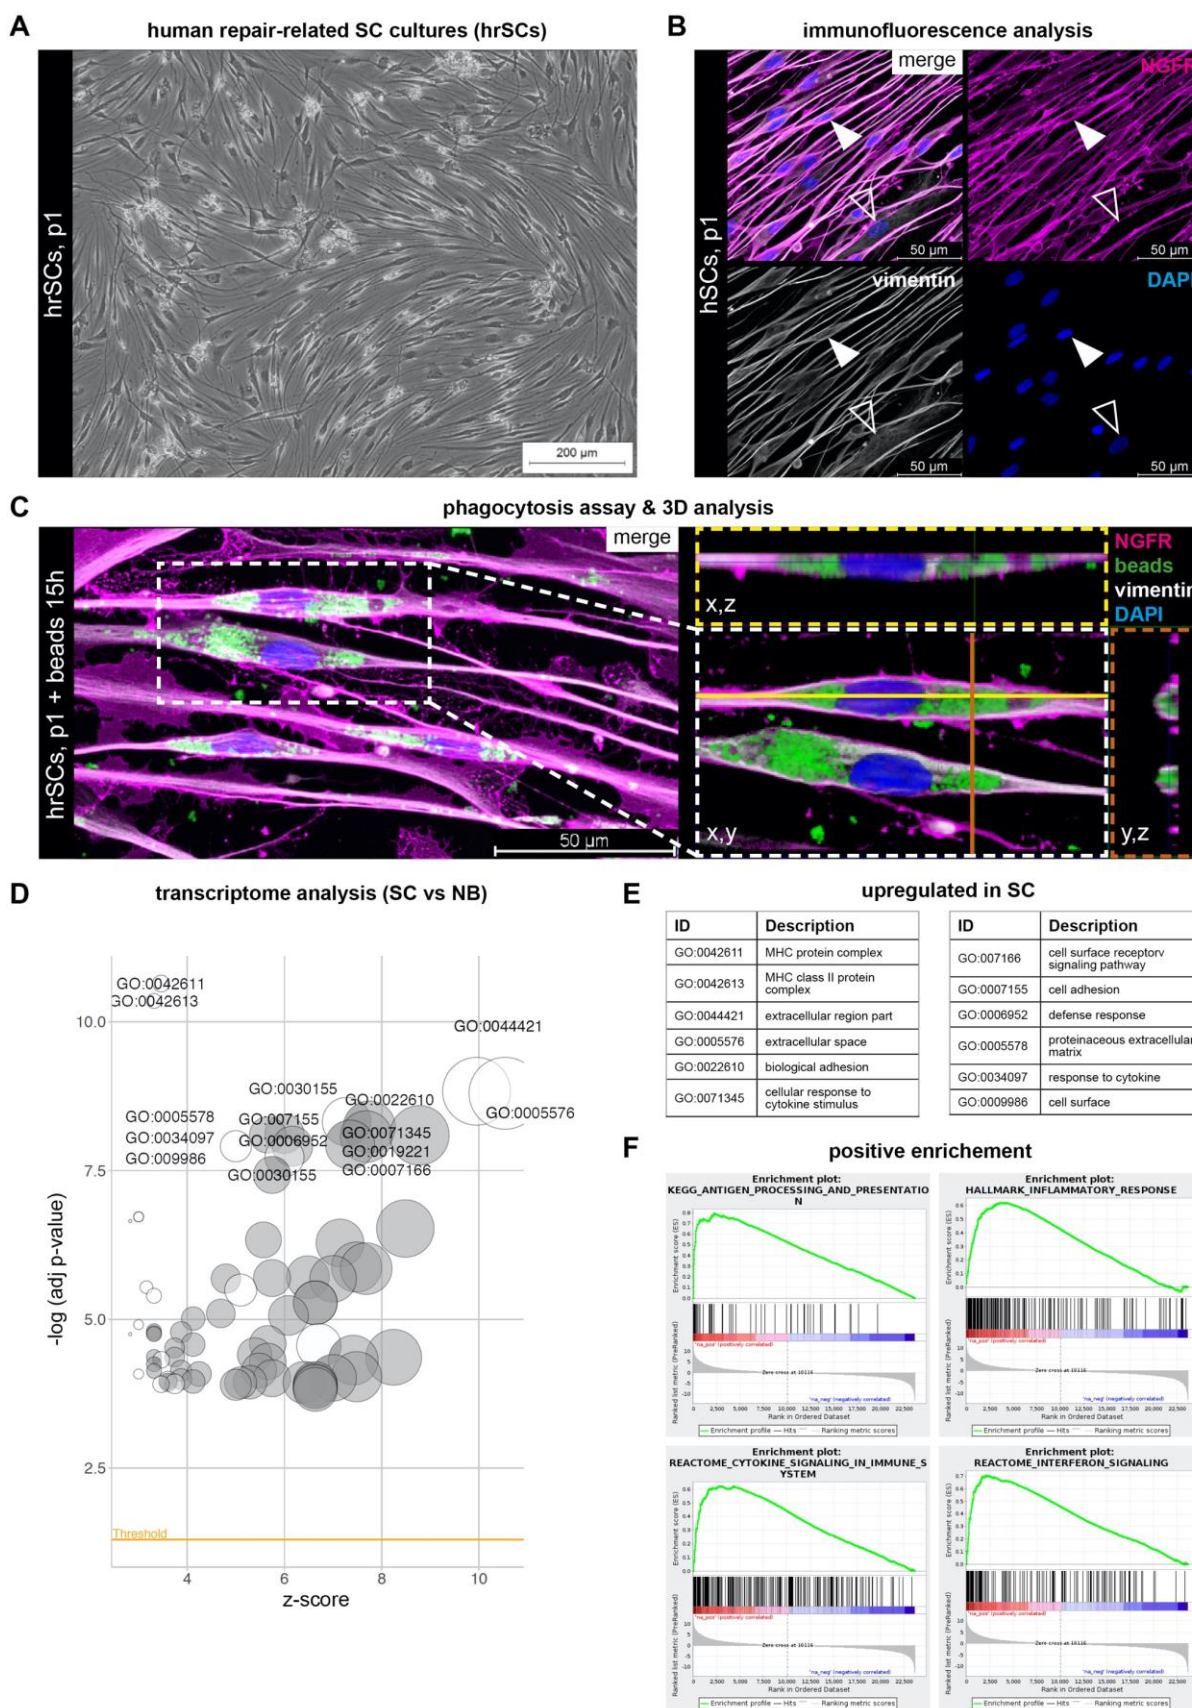

350 Figure 1 | Phagocytosis potential and inflammatory response of hrSCs. (A) Phase contrast image of a  
 351 representative passage 1 (p1) hrSC culture. (B) Immunostaining of p1 hrSCs for SC marker NGFR  
 352 (magenta), intermediate filament vimentin (grey) and nuclear stain DAPI (blue); arrowheads indicate a

353 NGFR negative and vimentin positive fibroblast. **(C)** 3D confocal image analysis of hrSCs exposed to 1  
354  $\mu\text{m}$  in diameter green fluorescent latex beads for 15 hours. Cross sections show internalized beads  
355 within the SC cytoplasm. **(D)** Gene ontology (GO) analysis of differentially expressed genes by RNA-seq  
356 between hrSCs (n=5) and NB cultures (n=5 independent biological replicates of 3 donors),  $-\log_{10}$  of the  
357 enrichment p values (cut-off <0.05) for filtered GO categories are plotted relative to Z-scores of average  
358 ratios in each category. Circle size represents the fraction of regulated genes per GO term. **(E)** Top 12  
359 GO terms among genes upregulated in hrSCs vs NB cultures. **(F)** Gene set enrichment analysis (GSEA)  
360 plots of hrSCs compared to NB cultures. Source data are provided in **Suppl. Tables 2-4**.

361

### 362 **Transcriptome profiling of human repair-related Schwann cells** 363 **revealed immunomodulatory gene signatures**

364 The phagocytic capacity of hrSCs towards cell-extrinsic material prompted us to evaluate  
365 whether pathways associated with inflammation and antigen presentation were active in  
366 hrSCs. To this end, we interrogated the transcriptome data generated by deep RNA-sequencing  
367 (RNA-seq) of hrSC cultures (n=5) and of neuroblastic tumor cells (NB cells) (n=5), which serve  
368 as models for neuronal cells. Comparison of the transcriptomes of hrSCs and NB cells revealed  
369 5822 differentially expressed genes ( $q\text{-value}<0.01$ ,  $|\log_2\text{FC}>1$ ), of which 3057 were  
370 upregulated and 2754 were down-regulated in hrSCs (**Suppl. Table 2**). Subsequent functional  
371 annotation analysis of genes unique to hrSCs demonstrated gene ontology (GO) terms  
372 prominent in MHC class I and class II protein complexes, cellular response to cytokine stimulus,  
373 and cytokine mediated signaling pathways (**Fig. 1D, Suppl. Table 3**). These results were further  
374 supported by a gene set enrichment analysis (GSEA), which confirmed the enrichment of genes  
375 associated with antigen processing and presentation alongside with cytokine signaling and an  
376 inflammatory response in hrSCs (**Fig. 1E, Suppl. Table 4**). Taken together, transcriptome profiling  
377 of hrSCs provides further evidence of cytokine signaling and upregulation of MHCII in response  
378 to nerve damage.

379 **Human repair-related SCs express MHCII and the co-signaling**  
380 **molecules CD40, CD80, CD86, CD58, HVEM and B7-H3**

381 As the primary function of APCs is to modulate T-cell activation through MHCII and the  
382 expression of co-signalling molecules, we further investigated whether the latter can be found  
383 on hrSCs. Therefore, we cultured hrSCs from eight different donor nerves and used flow  
384 cytometry to profile the expression of MHCII and selected co-signalling molecules. As the  
385 interaction of SCs with immune cells has been described as a dynamic process (Gold, Zielasek,  
386 Kiefer, Toyka, & Hartung, 1996), the analysis was performed at two time points, in passage one  
387 and passage two hrSC cultures. SC identity was determined by S100 expression, a well-  
388 established SC marker, and showed that mean purity of hrSCs cultures was 82% in passage one  
389 (p1) and 70% in passage 2 (p2) (**Fig. 2A**). The S100 negative cells, presumably nerve-associated  
390 fibroblasts, were excluded from further analysis (**Fig. 2A**). In the S100 positive hrSCs, we  
391 quantified the surface expression of MHCII and co-signalling molecules CD40, CD80, CD86, B7-  
392 H3, HVEM, PD-L1, PD-L2 and CD58. About 76% and 87% of hrSCs were positive for MHCII in p1  
393 and p2, respectively (**Fig. 2B**), which is in line with our previously published observation that  
394 MHCII expression increased with prolonged culture time (Weiss et al., 2016). Further, p1 as  
395 well as p2 hrSCs demonstrated expression of CD40, CD80, B7-H3, CD58, and HVEM (**Fig. 2C-G**).  
396 In contrast, neither PD-L1 nor PD-L2 were detected in p1 or p2 hrSC (**Fig. 2H-I**). Interestingly,  
397 most of p1 hrSCs were negative for CD86, while it was significantly upregulated in p2 cells (**Fig.**  
398 **2J**). Hence, hSCs indeed express - next to MHCII - several canonical co-signalling molecules that  
399 are required for T-cell activation and inhibition.

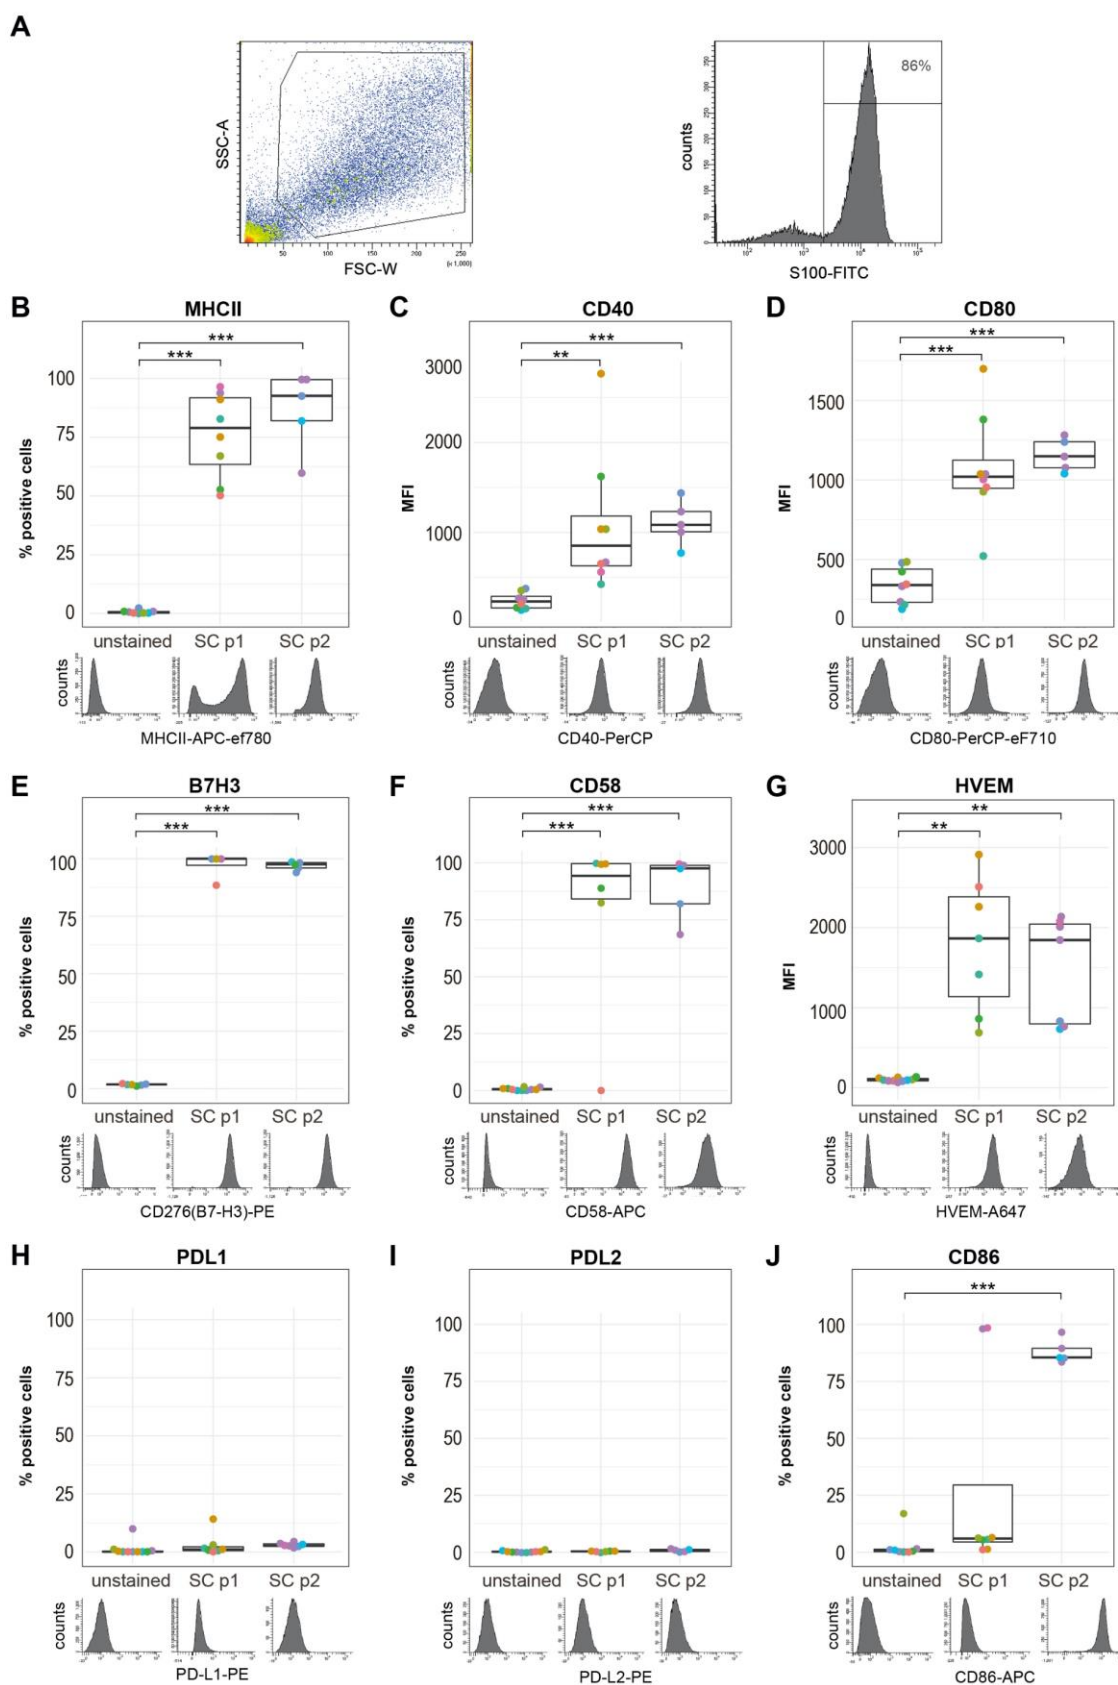

400  
401  
402  
403

Figure 2 | Flow cytometry phenotyping of MHCII and co-signaling molecules present on human repair-related Schwann cells. (A) Gating strategy for the identification of S100 positive hrSCs illustrated for one representative experiment. Intact cells are gated in the FSC vs SSC blot and S100 positive cells were



404 selected for further analysis. **(B-J)** Box plots show the expression status of MHCII and co-signaling  
405 molecules CD40, CD80, B7H3, CD58, HVEM, PD-L1, PD-L2 and CD86 of S100 positive hrSCs in passage 1  
406 (p1) and p2; technical replicates (same color); biological replicates (different color). The histograms  
407 underneath depict one representative experiment. Each biological replicate is conducted with hrSCs  
408 isolated from a different donor nerve. **(B, E, F, H, J)** Box plots represent the percentage of positive cells  
409 based on gates set in relation to unstained controls as displayed in the histograms. **(C, D, G, I)** Boxplots  
410 represent the mean fluorescence intensity (MFI). Boxes contain 50% of data and whiskers the upper  
411 and lower 25%; means are displayed as black horizontal lines. A two-way ANOVA using a post-hoc Holm  
412 p value correction was performed. \*  $p \leq 0.05$ ; \*\*  $p \leq 0.01$ ; \*\*\*  $p \leq 0.001$

413

### 414 **The stimulation of TLR3 and TLR4 had no effect on the expression of** 415 **co-signaling molecules in human repair-related Schwann cells**

416 Professional as well as non-professional APCs can upregulate the expression of co-signaling  
417 molecules upon toll-like receptor (TLR) ligation (Chen & Flies, 2013; Fitzgerald & Kagan, 2020;  
418 Mehrfeld, Zenner, Kornek, & Lukacs-Kornek, 2018). Our RNA-seq data of hrSCs showed  
419 enrichment in TLR signaling in comparison to neuronal cells (**Suppl. Table 4**), which motivated  
420 us to explore the expression of co-signaling molecules in response to inflammatory stimulation.  
421 First, we investigated which TLRs are expressed by hrSCs, to choose the corresponding ligands  
422 for further analysis. We found elevated expression levels of TLR1, TLR3, TLR4 and TLR6 mRNA  
423 (**Fig. 3A, Suppl. Fig. 1**). As TLR1 and TLR6 mainly function as heterodimers with TLR2, which was  
424 not expressed, we focused on TLR3 and TLR4. We thus stimulated p1 hrSC with the TLR4 agonist  
425 LPS and TLR3 agonist POLY:IC for 24 hours and subsequently analysed the expression status of  
426 co-signalling molecules (**Fig. 3A, Suppl. Fig. 1**). Interestingly, neither the addition of LPS nor  
427 POLY:IC caused a significant expression change of the analyzed co-signaling molecules in hrSCs  
428 (**Fig. 3B-E**), which might be due to the low expression levels of TLR3 and TLR4 (**Fig.3A**). Upon  
429 stimulation with POLY:IC a trend towards upregulation of CD40 and HVEM was seen, but  
430 substantial donor variance was observed (**Fig. 3B-E**). CD40 is not only a co-stimulatory molecule,  
431 but also a molecule that facilitates the activation of APCs upon binding of CD40-ligand (Chen &  
432 Flies, 2013). CD40-ligand did, however, not affect the expression of CD40 or any other co-  
433 signaling molecules tested (**Fig. 3B**). Together these data show that TLR and CD40 ligation do  
434 not affect the expression of co-signaling molecules.

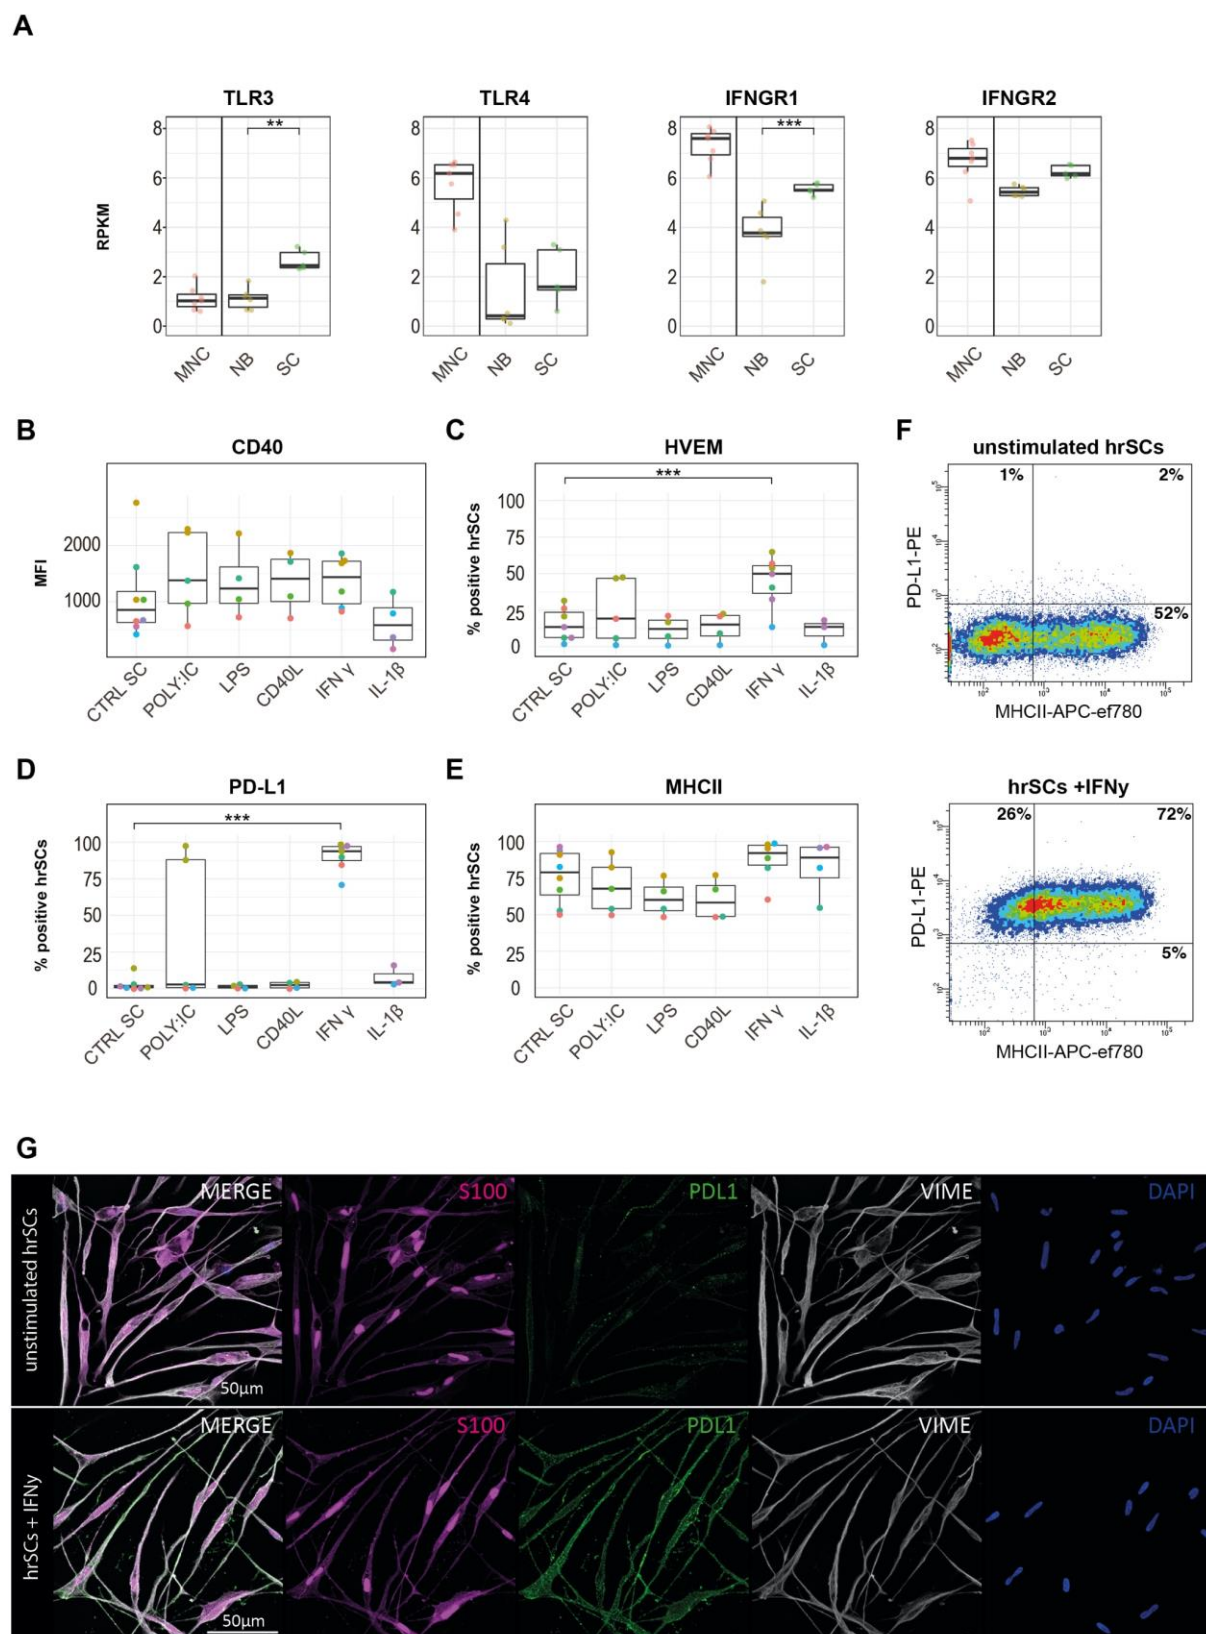

435  
 436 **Figure 3 | Immunophenotyping of human repair-related Schwann cells upon toll-like receptor and**  
 437 **cytokine stimulation. (A)** Enrichment of toll-like receptor (TLR)-related pathways. GSEA of RNA-seq data  
 438 sets of hrSCs compared to NB cultures. Box plots show the mRNA expression in reads per kilobase million  
 439 (RPKM) of TLR3, IFNGR1 and IFNGR2 by RNA-seq in NB cultures (NB, n=5) and hrSCs (SC, n=5). Bone

440 marrow mononuclear cells (MNC, n=5) are shown as reference. **(B-E)** FACS analysis of p1 cultures of  
441 hrSCs stimulated with POLY:IC, LPS, CD40L, IFN $\gamma$  and IL-1 $\beta$  for 24 h. Box plots show the MFI of CD40 (B),  
442 percentage of HVEM (C), PD-L1 (D) and MHCII (E) positive hrSCs in p1 cultures stimulated with POLY:IC,  
443 LPS, CD40L, IFN $\gamma$  and IL-1 $\beta$ . Each biological replicate is conducted with hrSCs isolated from a different  
444 donor nerve. Boxes contain 50% of data and whiskers the upper and lower 25%. Means are displayed  
445 as black horizontal lines. All experiments were performed in at least 4 independent biological replicates.  
446 A two-way ANOVA using a post-hoc Holm p value correction was performed; \*  $p \leq 0.05$ ; \*\*  $p \leq 0.01$ ;  
447 \*\*\*  $p \leq 0.001$ . **(F)** Representative FACS plots showing PD-L1 vs. MHCII expression of p1 hrSCs either  
448 unstimulated (upper plot) and after IFN $\gamma$  stimulation. **(G)** Immunofluorescence image of p1 hrSCs at day  
449 2 after purification without (upper panels) or with (lower panels) IFN $\gamma$  stimulation. HrSC cultures are  
450 stained for S100 (magenta), PD-L1 (green), vimentin (grey) and DAPI (blue).

451

### 452 **Human repair-related Schwann cells upregulate HVEM and PD-L1 upon** 453 **stimulation with IFN $\gamma$**

454 Inflammatory processes in peripheral nerve tissues as well as upon injury responses involve the  
455 release of pro-inflammatory mediators such as IFN $\gamma$  and IL-1 $\beta$  by macrophages (Chiu, Von  
456 Hehn, & Woolf, 2012; Yao, Graham, Akahata, Oh, & Jacobson, 2010). Notably, we found that  
457 the expression of both IFN $\gamma$  genes, *IFNGR1* and *IFNGR2*, was also upregulated in hrSC in  
458 comparison to neuronal cells (**Fig. 3A**). We further investigated the response of hrSCs to IFN $\gamma$   
459 as well as IL-1 $\beta$ . While IL-1 $\beta$  did not alter the expression of MHCII and any of the co-stimulatory  
460 molecules tested, IFN $\gamma$  led to a significant increase in HVEM expression (**Fig. 3C**). In addition,  
461 IFN $\gamma$  stimulation induced a profound upregulation of PD-L1 (**Fig. 3D**). PD-L1 expression in  
462 response to IFN $\gamma$  was further validated on stimulated hrSC using multicolor  
463 immunofluorescence stainings for S100, PD-L1 and vimentin (**Fig. 3G**). Concordant with our flow  
464 cytometry data, unstimulated p1 hrSC did not show a notable PD-L1 staining, whereas IFN $\gamma$   
465 stimulation strongly induced PD-L1 protein expression (**Fig. 3G**). These findings show that hrSCs  
466 can respond to IFN $\gamma$ , but not to IL-1 $\beta$ , by a significant up-regulation of the co-stimulatory  
467 molecule HVEM and the immune check-point molecule PD-L1.

468

### 469 **Secretome analysis of human repair-related Schwann cells reveals a** 470 **broad spectrum of immunoactive mediators**

471 As the inducible expression of co-signalling molecules by hrSCs together with their well-  
472 described function to recruit macrophages and neutrophils (Stratton et al., 2016; Tzekova,

473 Heinen, & Küry, 2014) points towards their active involvement in shaping a local immune  
474 response upon nerve injury, we further investigated a panel of immunoregulatory molecules  
475 secreted by hrSC. In order to model the *in vivo* situation following nerve injury, supernatants of  
476 hrSCs cultured in the absence or presence of neuronal cells and neuronal cell control cultures  
477 were analysed. Secretome analysis was performed using a protein array able to detect 274  
478 different secreted factors. A total of 84 secreted molecules were unique to hrSCs and one was  
479 only secreted by NB cells ( $q < 0.05$ ). None of the 84 proteins was differentially secreted in the  
480 SC-NB co-culture model as compared to SCs alone. We therefore considered these secreted  
481 proteins to be derived from hrSCs and further compared those to secreted proteins obtained  
482 from NB cultures (**Suppl. Table 5**). HrSC secreted factors included interleukins IL-6, IL-11, IL-15,  
483 TNF $\alpha$ , IFN $\gamma$ , molecules involved in phagocyte attraction and activation such as MCP-3, MCP-4  
484 or CXCL-16, molecules for neutrophil attraction and activation such as GRO, MIP3-alpha, IL-8  
485 (CXCL-8) or ENA-78 (**Fig. 4A**). Many of these molecules also directly acting on lymphocytes (**Fig.**  
486 **4A**), for example IL-6 that is stimulating the proliferation of antibody producing B-lymphocytes  
487 or IL-15 stimualting T-and NK- cell proliferation. Interestingly, hrSCs secreted osteopontin, a  
488 molecule involved in multiple processes including the induction of IFN $\gamma$  through NF- $\kappa$ B  
489 activation (Icer & Gezmen-Karadag, 2018). These findings demonstrate the plethora of  
490 immunoactive mediators secreted by hrSCs and suggests autocrine activity as well as paracrine  
491 modulation of myeloid cells and lymphocytes.

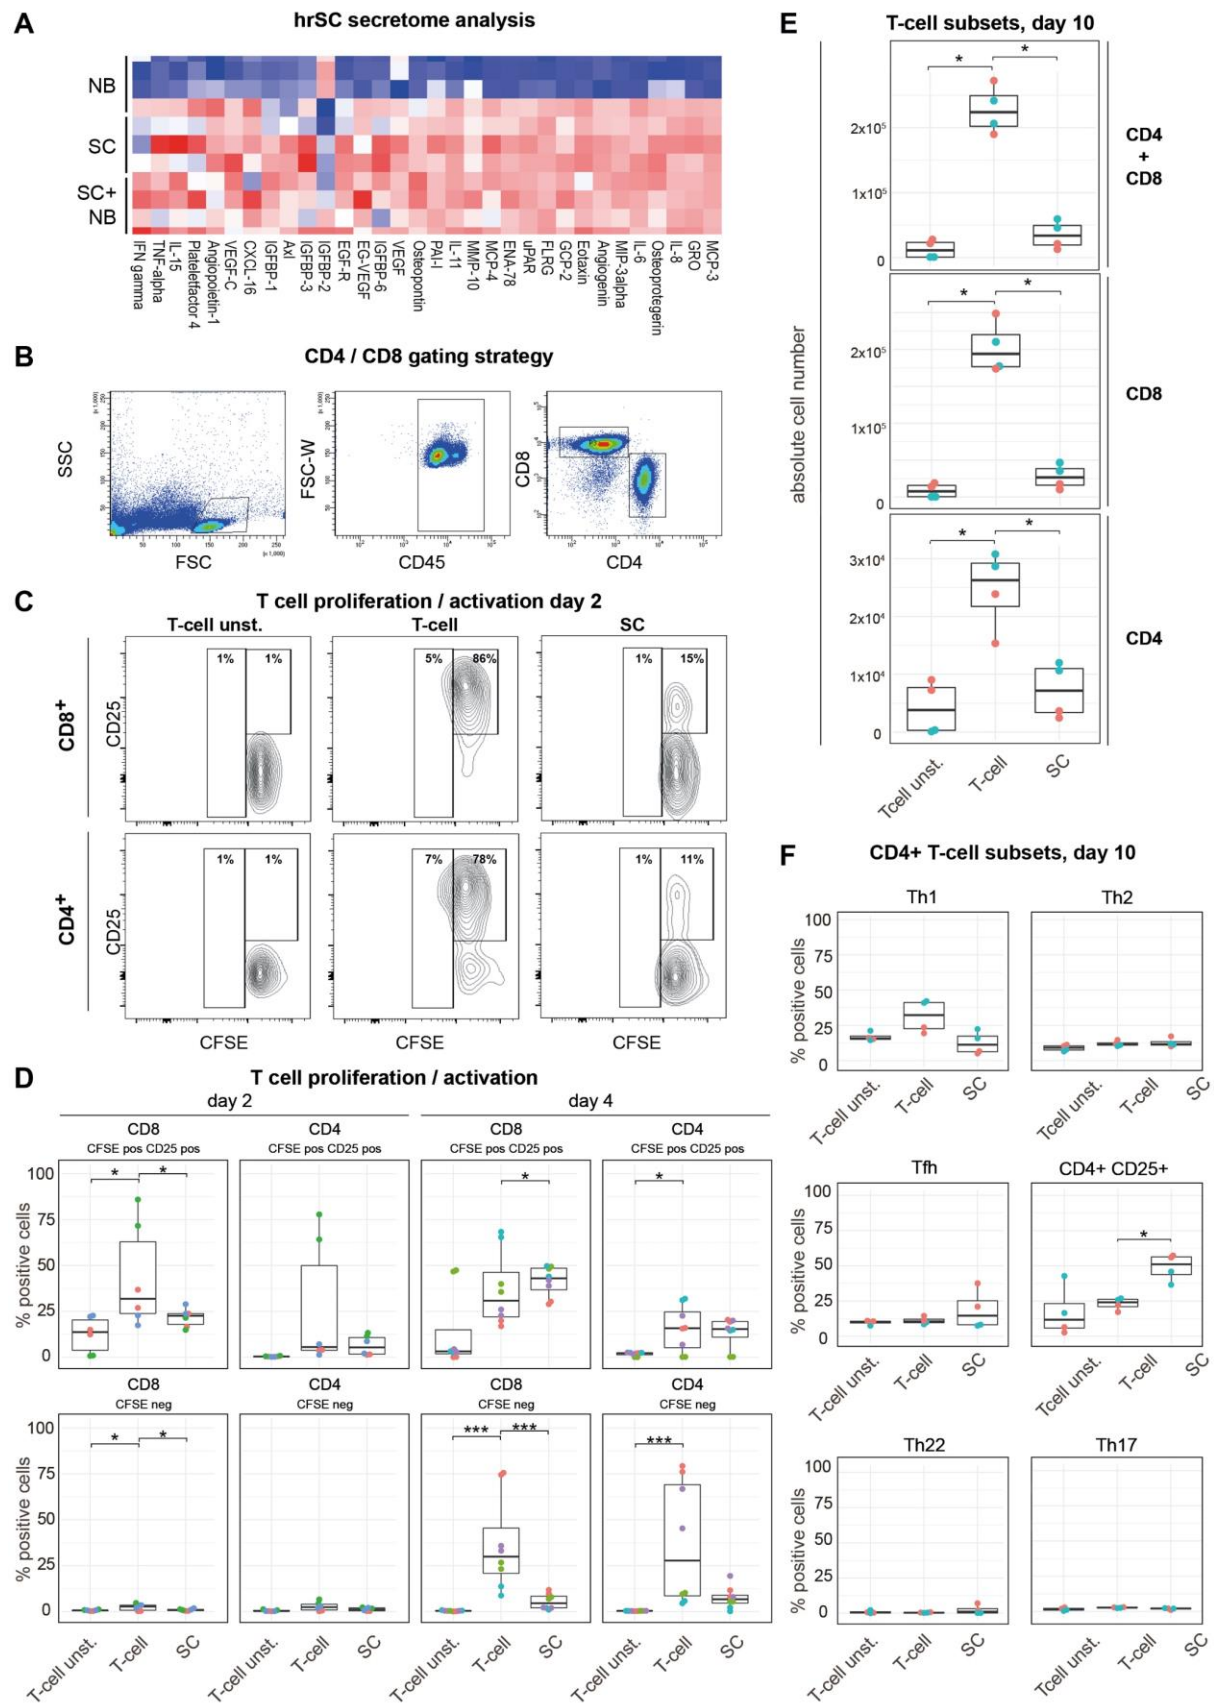

492  
493  
494  
495

**Figure 4 | HrSCs secrete immunoinhibitory mediators and inhibit allogeneic T-cell activation.** (A) Secretome analysis by antibody array. Heatmap displays the top 32 differentially secreted proteins ( $q < 0.05$ ,  $|\log_2FC > 0.3$ ) of hrSCs ( $n=5$ ) and SC-NB co-cultures ( $n=5$ ) vs. NB cultures (as neuronal cell model) ( $n=5$ ).

496 (B-F) Allogeneic CD3<sup>+</sup>T-cells were cultured for 2, 4 or 10 days in the absence (Tcell) or presence of hrSCs  
497 (SC) and stimulated with anti-CD3/CD28 beads and analysed by flow cytometry. As control unstimulated  
498 T-cells (Tcell unst.) were cultured. **(B)** Representative FACS plots show the gating strategy for CD4<sup>+</sup> and  
499 CD8<sup>+</sup> T-cells. **(C)** Representative FACS plots showing CD25 expression against CFSE of T-cells at day 2 of  
500 co-cultivation and in control cultures. **(D)** Boxplots show the absolute number of CFSE<sup>+</sup>/CD25<sup>+</sup> and CFSE<sup>-</sup>  
501 CD4<sup>+</sup> and CD8<sup>+</sup> T-cells at day 2 and day 4 based on gates set as illustrated in **(B-C)**. **(E)** Boxplots show the  
502 absolute number of alive CD4<sup>+</sup>, CD8<sup>+</sup> or combined CD4<sup>+</sup>and CD8<sup>+</sup> cells and **(F)** percentage of CD4<sup>+</sup> subsets  
503 evaluated via flow cytometry at day 10 based on gates set as published by (Mahnke et al., 2013). **(D-F)**  
504 Boxes contain 50% of data and whiskers the upper and lower 25% Means are displayed as black  
505 horizontal lines. All experiments were performed in at least 3 independent biological replicates. A two-  
506 way ANOVA using a post-hoc Holm p value correction was performed; \* p ≤ 0.05; \*\* p ≤ 0.01; \*\*\* p ≤  
507 0.001.

508

## 509 **Human repair-related Schwann cells reduce proliferation of allogeneic** 510 **T-cells**

511 Based on the overlapping features of hrSCs and APCs, i.e. phagocytosis, expression of MHCII,  
512 co-signaling and immune checkpoint molecules, and their inducible upregulation and secretion  
513 of T-cell modulatory molecules, we next asked whether hrSCs might affect T-cell activation and  
514 fate in the nerve injury context. Thus, we performed co-culture assays of hrSCs and allogeneic  
515 T-cells. More specifically, we used T-cells from healthy donors stimulated with anti-CD3/CD28  
516 beads to simulate an inflammatory environment similarly to peripheral nerve injury. We then  
517 evaluated the impact of co-culture assessing the total number of activated (CFSE<sup>+</sup>CD25<sup>+</sup>) and  
518 proliferated (CFSE<sup>-/dim</sup>) CD4<sup>+</sup> and CD8<sup>+</sup> T-cells **(Fig. 4B-C)**. At day 2 stimulated T-cells showed a  
519 significant increase in CFSE<sup>+</sup>CD25<sup>+</sup> and to a minor extend proliferated (CFSE<sup>-/dim</sup>) CD8<sup>+</sup> T-cells  
520 whereas the presence of hrSCs in co-culture significantly reduced this effect **(Fig. 4D)**. At day 4,  
521 stimulation of T-cells resulted in an increase of both, CD8<sup>+</sup> and CD4<sup>+</sup>, CFSE<sup>+</sup>CD25<sup>+</sup> as well as  
522 proliferated (CFSE<sup>-/dim</sup>) fraction. While proliferation was significantly reduced in CD8<sup>+</sup> T-cells by  
523 the presence of hrSCs in co-culture, CFSE<sup>+</sup>CD25<sup>+</sup> cells slightly increased **(Fig. 4D)**. A similar trend  
524 was observed in the CD4<sup>+</sup> population **(Fig. 4D)**. This effect became even more apparent at day  
525 10, when the total number of CD8<sup>+</sup> as well as CD4<sup>+</sup> T-cells was reduced to numbers comparable  
526 with those of unstimulated T-cells. **(Fig. 4E)**. Further, we interrogated the CD4<sup>+</sup> T-cell population  
527 for a potential shift among T-helper subpopulations, i.e. Th1, Th2, Tfh, Th17 and Th22, using a  
528 13-plex flow cytometry panels as previously published by Mahnke et al (Mahnke et al., 2013).

529 Notably, there was no clear trend towards a specific CD4<sup>+</sup> Th subset, yet a significantly higher  
530 percentage of CD4<sup>+</sup>CD25<sup>+</sup> cells was detected (**Fig. 4F**). In summary, hrSCs delayed proliferation  
531 of CD8<sup>+</sup> and CD4<sup>+</sup> T-cells, while promoting the long-term survival or potential switch towards a  
532 CD4<sup>+</sup>CD25<sup>+</sup> phenotype.

533

## 534 Discussion

535 Building on our previous characterization of the transcriptome and proteome of human repair-  
536 type SCs (Weiss et al., 2016) and studies on SCs and nerve inflammation in rodents (Hartlehnert  
537 et al., 2017; Meyer zu Hörste et al., 2010), we aimed to provide novel insight into the  
538 immunocompetence of human SCs in an injury condition. Using primary human repair-related  
539 SCs, hrSCs, as a unique model to study their immunophenotype and associated functional  
540 aspects, our study presents several layers of evidence that hrSCs possess features and functions  
541 of APCs and are capable of mediating T-cell dependent immunity. We demonstrate that hrSCs  
542 can express CD40, CD80, B7H3, CD58, CD86, HVEM and PD-L1 in addition to MHCII, secrete  
543 numerous immunomodulatory molecules, and inhibit allogeneic T-cell activation. It is well  
544 accepted that many functions of professional APCs, including the presentation of antigen via  
545 MHCII, the expression of co-signalling molecules and the secretion of anti- and pro-  
546 inflammatory molecules, are also carried out by non-professional APCs such as mast cells,  
547 eosinophils, and non-hematopoietic cells like epithelial cells (Kambayashi & Laufer, 2014;  
548 Schuijs, Hammad, & Lambrecht, 2019). With this study, we add compelling evidence that hrSCs  
549 could also act as non-professional APCs that may modulate the inflammatory processes within  
550 injured nerves. Studying the interaction of primary hrSCs and T-cells allowed the development  
551 of a broadly applicable functional *in vitro* model that contributes to the ongoing research in the  
552 field of neuroinflammatory disorders, regenerative medicine and immune oncology.

553

### 554 Human repair-related SCs possess features of antigen presenting cells

555 In line with our previous studies we show that hrSCs actively perform phagocytosis and express  
556 MHCII on their surface (Weiss et al., 2016). It has been recently described that rodent SCs have  
557 the ability to regulate MHCII dependent immunity, as the deletion of MHCII lead to a decreased  
558 infiltration of CD4<sup>+</sup> cells to the site of nerve injury (Hartlehnert et al., 2017). This suggests a

559 functional necessity of MHCII expression in nerve repair. The ability of SCs to present ingested  
560 molecules via MHCII and shape an immune response has been suggested before (Baetas-da-  
561 Cruz et al., 2009; Meyer Zu Horste et al., 2010; Steinhoff & Kaufmann, 1988; Van Rhijn et al.,  
562 2000), yet more detailed studies were needed to understand the role of SCs in phagocytosis,  
563 antigen presentation and immune cell modulation in human SCs.

564 It is well-established that not only classical APCs but also non-professional APCs, like mast cells  
565 or epithelial cells, are capable of phagocytosis and antigen presentation via MHC II to CD4+ T-  
566 cells (Kambayashi & Laufer, 2014; Schuijs et al., 2019). As non-professional APCs of non-  
567 hematopoietic origin do not primarily migrate to lymph nodes, their role in priming naïve T-  
568 cells may be less relevant, but their modulation of a local T-cell responses is widely accepted  
569 (Kambayashi & Laufer, 2014). Thus, the expression of co-signalling molecules alongside with  
570 MHCII and the secretion of other immunomodulatory molecules defines the effect of non-  
571 professional APCs in different tissues and conditions. In this study, we show that hrSC are able  
572 to express the co-signaling molecules CD58, CD80, and CD86 in addition to MHCII. These  
573 molecules are associated with an activation of T-cells (Chen & Flies, 2013; Greenwald, Freeman,  
574 & Sharpe, 2004).

575 Interestingly, a study comparing nerve biopsies of healthy patients and patients with chronic  
576 inflammatory demyelinating polyneuropathy (CIDP) identified that CD58 expressing SCs were  
577 only found in the latter (Van Rhijn et al., 2000). This could be due to a similarity in the role of  
578 SCs after nerve injury and during the interaction with immune cells in autoimmune diseases.  
579 However, Van Rhijn et al. did not observe CD86 or CD80 expressing SCs in healthy or CIDP  
580 patients, which indicates that the expression of co-signaling molecules detected in our *in vitro*  
581 model reflects a unique feature of hrSCs. Of note, our primary human SCs were isolated from  
582 peripheral nerves obtained after amputational surgeries and knowledge on pre-existing  
583 conditions such as non-diagnosed neuropathies and medication are limited. However, we  
584 observed consistent and reproducible effects throughout our molecular, phenotypic and  
585 functional characterization of hrSCs. Future studies should combine the knowledge derived  
586 from human nerve biopsies and isolated human SCs to validate the immunomodulatory  
587 capacities of this unique cell type in nerve injury and different diseases.

588 In addition to surface expression of co-signalling molecules, we found that hrSC secrete a  
589 variety of immunomodulators. This is in line with previous studies on human SCs that  
590 demonstrated the secretion of IL-6, IL-8, IL-15 and MCP-1 (Ozaki, Nagai, Lee, Myong, & Kim,



591 2008; Rutkowski et al., 1999). Our study enriches the repertoire of secreted hrSC molecules by  
592 cytokines like IL-11 and chemoattractants like MCP-3, MCP-4, CXCL-16, GRO and MIP3 $\alpha$   
593 suggesting an unexpected functional diversity. In contrast to Rutkowski et al., 1999, we did not  
594 detect the expression of IL-1 $\beta$  in our assay (Rutkowski et al., 1999). Taken together, these  
595 findings demonstrate that hrSCs express the co-signalling molecules CD58, CD80 and CD86  
596 together with MHCII and provide novel insight into the repertoire of hrSC secreted molecules,  
597 beyond neurotrophins, with immunoregulatory functions.

598

### 599 **Inhibition of allogeneic T-cell activation - evidence for an immuno-** 600 **regulatory function of human repair SCs**

601 Furthermore, we show that the exposure to hrSCs causes a delayed or even abrogated CD4<sup>+</sup> T-  
602 cell proliferation and activation. In line with this finding, we demonstrate that SCs express co-  
603 inhibitory molecules such as B7-H3, HVEM and provide the first report that hrSC upregulate  
604 PD-L1 after stimulation with IFN $\gamma$ . As not only the activation, but also the termination and  
605 resolution of inflammation through surface expression of inhibitory molecules is a hallmark of  
606 APCs, the presence of these molecules in hrSCs is remarkable. The source for IFN $\gamma$  release in  
607 inflammatory tissues are mainly NK, CD4<sup>+</sup> and CD8<sup>+</sup> T-cells as well as macrophages. HrSCs may  
608 even trigger the release of IFN $\gamma$  via secreted osteopontin that has been shown to induce IFN $\gamma$   
609 production in T-cells (Icer & Gezmen-Karadag, 2018). In this study we show that hrSCs are also  
610 capable of IFN $\gamma$  secretion. Whether the autocrine production of IFN $\gamma$  by hrSCs or the paracrine  
611 IFN $\gamma$  released by other cell types present at the site of nerve injury induces the surface  
612 expression of PD-L1 on hrSCs remains to be determined.

613 We further observed that delayed T-cell activation was not accompanied by a shift towards any  
614 particular T helper subset, but rather resulted in CD4<sup>+</sup> T-cells with high CD25 expression, which  
615 may represent a regulatory or exhausted phenotype. The hypothesis of regulatory/exhausted  
616 T-cells is supported by previous observations in rodent models (Meyer zu Horste et al., 2014;  
617 Meyer zu Hörste et al., 2010; F.-J. Wang, Cui, & Qian, 2018; X. Wang et al., 2014). Similarly, it  
618 has been shown that non-professional APCs like type II alveolar epithelial cells can prime  
619 antigen specific CD4<sup>+</sup> T-cells towards regulatory T-cells (Kambayashi & Laufer, 2014). This  
620 suggests that hrSCs in their activated state might, despite high MHCII, CD40, CD80 and CD58  
621 expression and secretion of pro-inflammatory cytokines IL-6, IL-8, TNF $\alpha$  and IFN $\gamma$ , adopt an  
622 antigen presenting cell phenotype similar to M2 macrophages, which tightly control and

623 terminate T-cell responses via B7-H3 and the PD-L1/PD-1 axis. Thus, a balance between the  
624 initiation and termination of an immune response may be essentially controlled through repair  
625 SCs during the multistep process of nerve regeneration.

626 The expression of PD-L1 by hrSCs after stimulation with IFN $\gamma$  supports the idea of a time and  
627 situation dependent role of repair SCs. It is tempting to speculate that repair SCs initiate the  
628 termination of the inflammatory response they helped to induce as first responders to nerve  
629 injury. Our data suggest that repair SCs might possess an immunoregulatory function that could  
630 prevent unnecessary damage to the neuronal environment by terminating an exceeding  
631 immune response, in which large amounts of IFN $\gamma$  are produced by immune cells recruited to  
632 the site of injury. To address this possibility, deeper phenotypic and functional characterization  
633 of especially CD4+CD25+ T-cells *in vitro/ex vivo* will be required in the future. Furthermore,  
634 manipulating the balance of pro- and anti-inflammatory profile of repair SCs might represent a  
635 novel therapeutic target in regenerative and pathological processes.

636

### 637 **Implications for the field of neuro-inflammatory disorders,** 638 **regenerative medicine and immune oncology**

639 As the interaction between SCs and immune cells is of importance not only after nerve injury  
640 but also regarding infectious, inflammatory and autoimmune disease of the peripheral nervous  
641 system, a comprehensive understanding of this interaction is crucial. It has recently been  
642 suggested that the activation of T-helper cells via MHCII by SC promotes neuropathic pain and  
643 axonal loss after nerve injury in mice (Hartlehnert et al., 2017). In this regard the presented  
644 panel of co-signaling molecules provides additional pharmaceutical targets to tackle this  
645 interaction. In addition, it has been shown that rats with experimental autoimmune neuritis, a  
646 common model for Guillain-Barré syndrome, showed a clinical improvement, reduced neuronal  
647 lymphocyte infiltration and a shift towards regulatory T-cells in the peripheral blood after  
648 administration of PD-L1 (Ding et al., 2016).

649 Importantly, it could be shown that SCs play a fundamental role in certain immune-oncological  
650 processes. SCs with a repair-related phenotype (including MHCII expression) are attracted by  
651 favorable forms of peripheral neuroblastic tumors, neuroblastomas, of a genetic subtype and  
652 trigger tumor cell maturation/differentiation and apoptosis, a phenomenon which could also  
653 be recapitulated in *in vitro* experiments (Weiss et al., 2021). These tumors, in comparison to  
654 their malignant counterpart, frequently show prominent MHCII+ and CD3+ immune cell

655 infiltrates (Ambros et al., 1996; Weiss et al., 2021). It will be interesting to study the  
656 composition of these infiltrates and whether and how SCs contribute to their recruitment and  
657 modulation.

658  
659 In summary, we here provide *in vitro* evidence that human SCs in an injury condition adopt  
660 functions of APCs, i.e, phagocytosis, up-regulation of MHCII and co-signaling molecules,  
661 secretion of an array of immunoregulatory molecules, and repression of T-cell activation. Our  
662 data suggest that repair SCs can participate in the termination of the inflammatory response to  
663 prevent excessive tissue damage and allow nerve regeneration. The molecules expressed and  
664 secreted by hrSC presented in this study will help to understand their complex interplay with  
665 immune cells after injury and in disease.

666

## 667 Author contributions

668 S.T.-M. conceptualized the project; J.B., T.W. and S.T.-M. planned experiments, performed  
669 research, analyzed and interpreted data and wrote the manuscript; H.S. and F.R. performed  
670 research and analyzed data; M.K. developed bioinformatics tools and analyzed data; A.D. and  
671 P.S. provided essential reagents, planned experiments and interpreted data; R.W. provided  
672 essential material; P.F.A. and I.M.A interpreted data; all authors reviewed the manuscript.

673

## 674 Acknowledgements

675 This study was supported by the Herzfeldersche Familienstiftung (Grants to S. Taschner-  
676 Mandl), Modicell (MC-IAPP Project 285875, to S. Taschner-Mandl), FFG Visiomics (Project  
677 10959423 to S. Taschner-Mandl) and FWF Liquidhope (Project I4162 to S. Taschner-Mandl) and  
678 St. Anna Kinderkrebsforschung. We are also grateful to Dieter Printz and the FACS core facility  
679 (Children's Cancer Research Institute) for excellent technical support.

680

## 681 Conflict of Interest Statement

682 The authors declare no conflict of interest.

683

## 684 References

- 685 Ambros, I M, Rumpler, S., Luegmayr, A., Hattinger, C. M., Strehl, S., Kovar, H., ... Ambros, P. F.  
686 (1997). Neuroblastoma cells can actively eliminate supernumerary MYCN gene copies by  
687 micronucleus formation--sign of tumour cell revertance? *European Journal of Cancer*  
688 (Oxford, England : 1990), 33(12), 2043–2049. [https://doi.org/10.1016/s0959-](https://doi.org/10.1016/s0959-8049(97)00204-9)  
689 8049(97)00204-9
- 690 Ambros, Ingeborg M., Zellner, A., Roald, B., Amann, G., Ladenstein, R., Printz, D., ... Ambros, P.  
691 F. (1996). Role of Ploidy, Chromosome 1p, and Schwann Cells in the Maturation of  
692 Neuroblastoma. *New England Journal of Medicine*, 334(23), 1505–1511.  
693 <https://doi.org/10.1056/NEJM199606063342304>
- 694 Armati, P. J., Pollard, J. D., & Gatenby, P. (1990). Rat and human Schwann cells in vitro can  
695 synthesize and express MHC molecules. *Muscle & Nerve*, 13(2), 106–116.  
696 <https://doi.org/10.1002/mus.880130204>
- 697 Azam, S. H., & Pecot, C. V. (2016). Cancer's got nerve: Schwann cells drive perineural invasion.  
698 *The Journal of Clinical Investigation*, 126(4), 1242–1244.  
699 <https://doi.org/10.1172/JCI86801>
- 700 Baetas-da-Cruz, W., Alves, L., Pessolani, M. C. V, Barbosa, H. S., Régnier-Vigouroux, A., Corte-  
701 Real, S., & Cavalcante, L. a. (2009). Schwann cells express the macrophage mannose  
702 receptor and MHC class II. Do they have a role in antigen presentation? *Journal of the*  
703 *Peripheral Nervous System : JPNS*, 14(2), 84–92. [https://doi.org/10.1111/j.1529-](https://doi.org/10.1111/j.1529-8027.2009.00217.x)  
704 8027.2009.00217.x
- 705 Bergsteinsdottir, K., Kingston, A., Mirsky, R., & Jessen, K. R. (1991). Rat Schwann cells produce  
706 interleukin-1. *Journal of Neuroimmunology*, 34(1), 15–23. [https://doi.org/10.1016/0165-](https://doi.org/10.1016/0165-5728(91)90094-N)  
707 5728(91)90094-N
- 708 Biedler, J. L., Helson, L., & Spengler, B. A. (1973). Morphology and growth, tumorigenicity, and  
709 cytogenetics of human neuroblastoma cells in continuous culture. *Cancer Research*,  
710 33(11), 2643–2652.
- 711 Biedler, J. L., Roffler-Tarlov, S., Schachner, M., & Freedman, L. S. (1978). Multiple  
712 neurotransmitter synthesis by human neuroblastoma cell lines and clones. *Cancer*  
713 *Research*, 38(11 Pt 1), 3751–3757.

- 714 Bunimovich, Y. L., Keskinov, A. A., Shurin, G. V., & Shurin, M. R. (2017). Schwann cells: a new  
715 player in the tumor microenvironment. *Cancer Immunology, Immunotherapy : CII*, 66(8),  
716 959–968. <https://doi.org/10.1007/s00262-016-1929-z>
- 717 Chen, L., & Flies, D. B. (2013). Molecular mechanisms of T cell co-stimulation and co-  
718 inhibition. *Nature Reviews. Immunology*, 13(4), 227–242.  
719 <https://doi.org/10.1038/nri3405>
- 720 Chiu, I. M., Von Hehn, C. A., & Woolf, C. J. (2012). Neurogenic inflammation and the  
721 peripheral nervous system in host defense and immunopathology. *Nature Neuroscience*.  
722 <https://doi.org/10.1038/nn.3144>
- 723 Combaret, V., Turc-Carel, C., Thiesse, P., Rebillard, A. C., Frappaz, D., Haus, O., ... Favrot, M. C.  
724 (1995). Sensitive detection of numerical and structural aberrations of chromosome 1 in  
725 neuroblastoma by interphase fluorescence in situ hybridization. Comparison with  
726 restriction fragment length polymorphism and conventional cytogenetic analyses.  
727 *International Journal of Cancer*, 61(2), 185–191. <https://doi.org/10.1002/ijc.2910610208>
- 728 Crawford, S. E., Stellmach, V., Ranalli, M., Huang, X., Huang, L., Volpert, O., ... Bouck, N.  
729 (2001). Pigment epithelium-derived factor (PEDF) in neuroblastoma: a multifunctional  
730 mediator of Schwann cell antitumor activity. *Journal of Cell Science*, 114(Pt 24), 4421–  
731 4428.
- 732 Ding, Y., Han, R., Jiang, W., Xiao, J., Liu, H., Chen, X., ... Hao, J. (2016). Programmed Death  
733 Ligand 1 Plays a Neuroprotective Role in Experimental Autoimmune Neuritis by  
734 Controlling Peripheral Nervous System Inflammation of Rats. *Journal of Immunology*  
735 (*Baltimore, Md. : 1950*), 197(10), 3831–3840.  
736 <https://doi.org/10.4049/jimmunol.1601083>
- 737 Direder, M., Weiss, T., Copic, D., Vorstandlechner, V., Laggner, M., Mildner, C. S., ... Mildner,  
738 M. (2021). Schwann cells contribute to keloid formation. *MedRxiv*,  
739 2021.08.09.21261701. <https://doi.org/10.1101/2021.08.09.21261701>
- 740 Dobin, A., Davis, C. A., Schlesinger, F., Drenkow, J., Zaleski, C., Jha, S., ... Gingeras, T. R. (2013).  
741 STAR: ultrafast universal RNA-seq aligner. *Bioinformatics (Oxford, England)*, 29(1), 15–21.  
742 <https://doi.org/10.1093/bioinformatics/bts635>
- 743 Duan, R.-S., Jin, T., Yang, X., Mix, E., Adem, A., & Zhu, J. (2007). Apolipoprotein E deficiency  
744 enhances the antigen-presenting capacity of Schwann cells. *Glia*, 55(7), 772–776.  
745 <https://doi.org/10.1002/glia.20498>

- 746 Fischer, M., & Berthold, F. (2003). Characterization of the gene expression profile of  
747 neuroblastoma cell line IMR-5 using serial analysis of gene expression. *Cancer Letters*,  
748 *190*(1), 79–87. [https://doi.org/10.1016/s0304-3835\(02\)00581-5](https://doi.org/10.1016/s0304-3835(02)00581-5)
- 749 Fitzgerald, K. A., & Kagan, J. C. (2020). Toll-like Receptors and the Control of Immunity. *Cell*,  
750 *180*(6), 1044–1066. <https://doi.org/10.1016/j.cell.2020.02.041>
- 751 Gaudet, A. D., Popovich, P. G., & Ramer, M. S. (2011). Wallerian degeneration: gaining  
752 perspective on inflammatory events after peripheral nerve injury. *Journal of*  
753 *Neuroinflammation*, *8*, 110. <https://doi.org/10.1186/1742-2094-8-110>
- 754 Gentleman, R. C., Carey, V. J., Bates, D. M., Bolstad, B., Dettling, M., Dudoit, S., ... Zhang, J.  
755 (2004). Bioconductor: open software development for computational biology and  
756 bioinformatics. *Genome Biology*, *5*(10), R80. <https://doi.org/10.1186/gb-2004-5-10-r80>
- 757 Goethals, S., Ydens, E., Timmerman, V., & Janssens, S. (2010). Toll-like receptor expression in  
758 the peripheral nerve. *GLIA*, *58*(14), 1701–1709. <https://doi.org/10.1002/glia.21041>
- 759 Gold, R., Zielasek, J., Kiefer, R., Toyka, K. V., & Hartung, H. P. (1996). Secretion of nitrite by  
760 Schwann cells and its effect on T-cell activation in vitro. *Cellular Immunology*, *168*(1), 69–  
761 77. <https://doi.org/10.1006/cimm.1996.0050>
- 762 Gomez-Sanchez, J. A., Carty, L., Iruarrizaga-Lejarreta, M., Palomo-Irigoyen, M., Varela-Rey, M.,  
763 Griffith, M., ... Jessen, K. R. (2015). Schwann cell autophagy, myelinophagy, initiates  
764 myelin clearance from injured nerves. *The Journal of Cell Biology*, *210*(1), 153–168.  
765 <https://doi.org/10.1083/jcb.201503019>
- 766 Greenwald, R. J., Freeman, G. J., & Sharpe, A. H. (2004). THE B7 FAMILY REVISITED. *Annual*  
767 *Review of Immunology*, *23*(1), 515–548.  
768 <https://doi.org/10.1146/annurev.immunol.23.021704.115611>
- 769 Hartlehnert, M., Derksen, A., Hagenacker, T., Kindermann, D., Schäfers, M., Pawlak, M., ...  
770 Meyer zu Horste, G. (2017). Schwann cells promote post-traumatic nerve inflammation  
771 and neuropathic pain through MHC class II. *Scientific Reports*. London.  
772 <https://doi.org/10.1038/s41598-017-12744-2>
- 773 Hartley, S. W., & Mullikin, J. C. (2015). QoRTs: a comprehensive toolset for quality control and  
774 data processing of RNA-Seq experiments. *BMC Bioinformatics*, *16*(1), 224.  
775 <https://doi.org/10.1186/s12859-015-0670-5>
- 776 Hörste, G. M. Z., Hu, W., Hartung, H. P., Lehmann, H. C., & Kieseier, B. C. (2008). The  
777 immunocompetence of Schwann cells. *Muscle and Nerve*.

- 778 <https://doi.org/10.1002/mus.20893>
- 779 Icer, M. A., & Gezmen-Karadag, M. (2018). The multiple functions and mechanisms of  
780 osteopontin. *Clinical Biochemistry*, *59*, 17–24.  
781 <https://doi.org/10.1016/j.clinbiochem.2018.07.003>
- 782 Jang, S. Y., Shin, Y. K., Park, S. Y., Park, J. Y., Lee, H. J., Yoo, Y. H., ... Park, H. T. (2016).  
783 Autophagic myelin destruction by Schwann cells during Wallerian degeneration and  
784 segmental demyelination. *Glia*, *64*(5), 730–742. <https://doi.org/10.1002/glia.22957>
- 785 Jessen, K. R., & Mirsky, R. (2016). The repair Schwann cell and its function in regenerating  
786 nerves. *The Journal of Physiology*, *594*(13), 3521–3531.  
787 <https://doi.org/10.1113/JP270874>
- 788 Kaisho, T., & Akira, S. (2000). Critical roles of Toll-like receptors in host defense. *Critical*  
789 *Reviews in Immunology*, *20*(5), 393–405.
- 790 Kambayashi, T., & Laufer, T. M. (2014). Atypical MHC class II-expressing antigen-presenting  
791 cells: can anything replace a dendritic cell? *Nature Reviews. Immunology*, *14*(11), 719–  
792 730. <https://doi.org/10.1038/nri3754>
- 793 Karanth, S., Yang, G., Yeh, J., & Richardson, P. M. (2006). Nature of signals that initiate the  
794 immune response during Wallerian degeneration of peripheral nerves. *Experimental*  
795 *Neurology*, *202*(1), 161–166. <https://doi.org/10.1016/j.expneurol.2006.05.024>
- 796 Kingston, A. E., Bergsteinsdottir, K., Jessen, K. R., Van der Meide, P. H., Colston, M. J., &  
797 Mirsky, R. (1989). Schwann cells co-cultured with stimulated T cells and antigen express  
798 major histocompatibility complex (MHC) class II determinants without interferon-  
799 gamma pretreatment: synergistic effects of interferon-gamma and tumor necrosis factor  
800 on MHC class II in. *European Journal of Immunology*, *19*(1), 177–183.  
801 <https://doi.org/10.1002/eji.1830190128>
- 802 La Fleur, M., Underwood, J. L., Rappolee, D. A., & Werb, Z. (1996). Basement membrane and  
803 repair of injury to peripheral nerve: defining a potential role for macrophages, matrix  
804 metalloproteinases, and tissue inhibitor of metalloproteinases-1. *The Journal of*  
805 *Experimental Medicine*, *184*(6), 2311–2326. <https://doi.org/10.1084/jem.184.6.2311>
- 806 Law, C. W., Chen, Y., Shi, W., & Smyth, G. K. (2014). voom: Precision weights unlock linear  
807 model analysis tools for RNA-seq read counts. *Genome Biology*, *15*(2), R29.  
808 <https://doi.org/10.1186/gb-2014-15-2-r29>
- 809 Lee, H., Jo, E. K., Choi, S. Y., Oh, S. B., Park, K., Soo Kim, J., & Lee, S. J. (2006). Necrotic

- 810 neuronal cells induce inflammatory Schwann cell activation via TLR2 and TLR3:  
811 Implication in Wallerian degeneration. *Biochemical and Biophysical Research*  
812 *Communications*, 350(3), 742–747. <https://doi.org/10.1016/j.bbrc.2006.09.108>
- 813 Lilje, O., & Armati, P. J. (1997). The distribution and abundance of MHC and ICAM-1 on  
814 Schwann cells in vitro. *Journal of Neuroimmunology*, 77(1), 75–84.  
815 [https://doi.org/10.1016/S0165-5728\(97\)00063-5](https://doi.org/10.1016/S0165-5728(97)00063-5)
- 816 Mahnke, Y. D., Beddall, M. H., & Roederer, M. (2013). OMIP-017: Human CD4+ helper T-cell  
817 subsets including follicular helper cells. *Cytometry Part A*, 83 A(5), 439–440.  
818 <https://doi.org/10.1002/cyto.a.22269>
- 819 Mancardi, G. L., Cadoni, A., Zicca, A., Schenone, A., Tabaton, M., De Martini, I., & Zaccheo, D.  
820 (1988). HLA-DR Schwann cell reactivity in peripheral neuropathies of different origins.  
821 *Neurology*, 38(6), 848–851. <https://doi.org/10.1212/wnl.38.6.848>
- 822 Mehrfeld, C., Zenner, S., Kornek, M., & Lukacs-Kornek, V. (2018). The Contribution of Non-  
823 Professional Antigen-Presenting Cells to Immunity and Tolerance in the Liver. *Frontiers*  
824 *in Immunology*, 9, 635. <https://doi.org/10.3389/fimmu.2018.00635>
- 825 Meyer zu Horste, G., Cordes, S., Mausberg, A. K., Zozulya, A. L., Wessig, C., Sparwasser, T., ...  
826 Kieseier, B. C. (2014). FoxP3+ regulatory T cells determine disease severity in rodent  
827 models of inflammatory neuropathies. *PLoS One*, 9(10), e108756.  
828 <https://doi.org/10.1371/journal.pone.0108756>
- 829 Meyer Zu Horste, G., Heidenreich, H., Lehmann, H. C., Ferrone, S., Hartung, H.-P., Wiendl, H.,  
830 & Kieseier, B. C. (2010). Expression of antigen processing and presenting molecules by  
831 Schwann cells in inflammatory neuropathies. *Glia*, 58(1), 80–92.  
832 <https://doi.org/10.1002/glia.20903>
- 833 Meyer zu Hörste, G., Heidenreich, H., Mausberg, A. K., Lehmann, H. C., ten Asbroek, A. L. M.  
834 A., Saavedra, J. T., ... Kieseier, B. C. (2010). Mouse Schwann cells activate MHC class I and  
835 II restricted T-cell responses, but require external peptide processing for MHC class II  
836 presentation. *Neurobiology of Disease*, 37(2), 483–490.  
837 <https://doi.org/10.1016/j.nbd.2009.11.006>
- 838 Meyer zu Hörste, G., Hu, W., Hartung, H.-P., Lehmann, H. C., & Kieseier, B. C. (2008). The  
839 immunocompetence of Schwann cells. *Muscle & Nerve*, 37(1), 3–13.  
840 <https://doi.org/10.1002/mus.20893>
- 841 Momoi, M., Kennett, R. H., & Glick, M. C. (1980). A membrane glycoprotein from human



- 842 neuroblastoma cells isolated with the use of a monoclonal antibody. *The Journal of*  
843 *Biological Chemistry*, 255(24), 11914–11921.
- 844 Mootha, V. K., Lindgren, C. M., Eriksson, K.-F., Subramanian, A., Sihag, S., Lehar, J., ... Groop, L.  
845 C. (2003). PGC-1 $\alpha$ -responsive genes involved in oxidative phosphorylation are  
846 coordinately downregulated in human diabetes. *Nature Genetics*, 34(3), 267–273.  
847 <https://doi.org/10.1038/ng1180>
- 848 Murata, K.-Y., & Dalakas, M. C. (2000). Expression of the co-stimulatory molecule BB-1, the  
849 ligands CTLA-4 and CD28 and their mRNAs in chronic inflammatory demyelinating  
850 polyneuropathy. *Brain : A Journal of Neurology*, 123 ( Pt 8, 1660–1666.  
851 [https://doi.org/10.1016/S0002-9440\(10\)65141-3](https://doi.org/10.1016/S0002-9440(10)65141-3)
- 852 Nocera, G., & Jacob, C. (2020). Mechanisms of Schwann cell plasticity involved in peripheral  
853 nerve repair after injury. *Cellular and Molecular Life Sciences : CMLS*, 77(20), 3977–  
854 3989. <https://doi.org/10.1007/s00018-020-03516-9>
- 855 Ozaki, A., Nagai, A., Lee, Y. B., Myong, N. H., & Kim, S. U. (2008). Expression of cytokines and  
856 cytokine receptors in human Schwann cells. *Neuroreport*, 19(1), 31–35.  
857 <https://doi.org/10.1097/WNR.0b013e3282f27e60>
- 858 Ritchie, M. E., Phipson, B., Wu, D., Hu, Y., Law, C. W., Shi, W., & Smyth, G. K. (2015). limma  
859 powers differential expression analyses for RNA-sequencing and microarray studies.  
860 *Nucleic Acids Research*, 43(7), e47. <https://doi.org/10.1093/nar/gkv007>
- 861 Roberts, S. L., Dun, X.-P., Doddrell, R. D. S., Mindos, T., Drake, L. K., Onaitis, M. W., ...  
862 Parkinson, D. B. (2017). Sox2 expression in Schwann cells inhibits myelination in vivo and  
863 induces influx of macrophages to the nerve. *Development (Cambridge, England)*,  
864 144(17), 3114–3125. <https://doi.org/10.1242/dev.150656>
- 865 Rutkowski, J. L., Tuite, G. F., Lincoln, P. M., Boyer, P. J., Tennekoon, G. I., & Kunkel, S. L. (1999).  
866 Signals for proinflammatory cytokine secretion by human Schwann cells. *Journal of*  
867 *Neuroimmunology*, 101(1), 47–60. [https://doi.org/10.1016/s0165-5728\(99\)00132-0](https://doi.org/10.1016/s0165-5728(99)00132-0)
- 868 Samuel, N. M., Mirsky, R., Grange, J. M., & Jessen, K. R. (1987). Expression of major  
869 histocompatibility complex class I and class II antigens in human Schwann cell cultures  
870 and effects of infection with Mycobacterium leprae. *Clinical and Experimental*  
871 *Immunology*, 68(3), 500–509.
- 872 Schuijs, M. J., Hammad, H., & Lambrecht, B. N. (2019). Professional and “Amateur” Antigen-  
873 Presenting Cells In Type 2 Immunity. *Trends in Immunology*, 40(1), 22–34.

- 874 <https://doi.org/10.1016/j.it.2018.11.001>
- 875 Spierings, E., De Boer, T., Zulianello, L., & Ottenhoff, T. H. M. (2000). Novel mechanisms in the  
876 immunopathogenesis of leprosy nerve damage: The role of schwann cells, T cells and  
877 *Mycobacterium leprae*. *Immunology and Cell Biology*. [https://doi.org/10.1046/j.1440-](https://doi.org/10.1046/j.1440-1711.2000.00939.x)  
878 [1711.2000.00939.x](https://doi.org/10.1046/j.1440-1711.2000.00939.x)
- 879 Steinhoff, U., & Kaufmann, S. H. (1988). Specific lysis by CD8+ T cells of Schwann cells  
880 expressing *Mycobacterium leprae* antigens. *European Journal of Immunology*, *18*(6),  
881 969–972. <https://doi.org/10.1002/eji.1830180622>
- 882 Stock, C., Bozsaky, E., Watzinger, F., Poetschger, U., Orel, L., Lion, T., ... Ambros, P. F. (2008).  
883 Genes proximal and distal to MYCN are highly expressed in human neuroblastoma as  
884 visualized by comparative expressed sequence hybridization. *The American Journal of*  
885 *Pathology*, *172*(1), 203–214. <https://doi.org/10.2353/ajpath.2008.061263>
- 886 Stratton, J. A., & Shah, P. T. (2016). Macrophage polarization in nerve injury: do Schwann cells  
887 play a role? *Neural Regeneration Research*, *11*(1), 53–57. [https://doi.org/10.4103/1673-](https://doi.org/10.4103/1673-5374.175042)  
888 [5374.175042](https://doi.org/10.4103/1673-5374.175042)
- 889 Stratton, J. A., Shah, P. T., Kumar, R., Stykel, M. G., Shapira, Y., Grochmal, J., ... Midha, R.  
890 (2016). The immunomodulatory properties of adult skin-derived precursor Schwann  
891 cells: implications for peripheral nerve injury therapy. *The European Journal of*  
892 *Neuroscience*, *43*(3), 365–375. <https://doi.org/10.1111/ejn.13006>
- 893 Subramanian, A., Tamayo, P., Mootha, V. K., Mukherjee, S., Ebert, B. L., Gillette, M. A., ...  
894 Mesirov, J. P. (2005). Gene set enrichment analysis: A knowledge-based approach for  
895 interpreting genome-wide expression profiles. *Proceedings of the National Academy of*  
896 *Sciences*, *102*(43), 15545 LP – 15550. <https://doi.org/10.1073/pnas.0506580102>
- 897 Toews, A. D., Barrett, C., & Morell, P. (1998). Monocyte chemoattractant protein 1 is  
898 responsible for macrophage recruitment following injury to sciatic nerve. *Journal of*  
899 *Neuroscience Research*, *53*(2), 260–267. [https://doi.org/10.1002/\(SICI\)1097-](https://doi.org/10.1002/(SICI)1097-4547(19980715)53:2<260::AID-JNR15>3.0.CO;2-A)  
900 [4547\(19980715\)53:2<260::AID-JNR15>3.0.CO;2-A](https://doi.org/10.1002/(SICI)1097-4547(19980715)53:2<260::AID-JNR15>3.0.CO;2-A)
- 901 Tofaris, G. K., Patterson, P. H., Jessen, K. R., & Mirsky, R. (2002). Denervated Schwann cells  
902 attract macrophages by secretion of leukemia inhibitory factor (LIF) and monocyte  
903 chemoattractant protein-1 in a process regulated by interleukin-6 and LIF. *The Journal of*  
904 *Neuroscience : The Official Journal of the Society for Neuroscience*, *22*(15), 6696–6703.  
905 <https://doi.org/10.1523/JNEUROSCI.22-15-06696.2002>

- 906 Tzekova, N., Heinen, A., & Küry, P. (2014). Molecules involved in the crosstalk between  
907 immune- and peripheral nerve Schwann cells. *Journal of Clinical Immunology*.  
908 <https://doi.org/10.1007/s10875-014-0015-6>
- 909 Van Rhijn, I., Van den Berg, L. H., Bosboom, W. M. J., Otten, H. G., & Logtenberg, T. (2000).  
910 Expression of accessory molecules for T-cell activation in peripheral nerve of patients  
911 with CIDP and vasculitic neuropathy. *Brain*, *123*(10), 2020–2029.  
912 <https://doi.org/10.1093/brain/123.10.2020>
- 913 Wang, F.-J., Cui, D., & Qian, W.-D. (2018). Therapeutic Effect of CD4+CD25+ Regulatory T Cells  
914 Amplified In Vitro on Experimental Autoimmune Neuritis in Rats. *Cellular Physiology and*  
915 *Biochemistry : International Journal of Experimental Cellular Physiology, Biochemistry,*  
916 *and Pharmacology*, *47*(1), 390–402. <https://doi.org/10.1159/000489919>
- 917 Wang, X., Zheng, X.-Y., Ma, C., Wang, X.-K., Wu, J., Adem, A., ... Zhang, H.-L. (2014). Mitigated  
918 Tregs and augmented Th17 cells and cytokines are associated with severity of  
919 experimental autoimmune neuritis. *Scandinavian Journal of Immunology*, *80*(3), 180–  
920 190. <https://doi.org/10.1111/sji.12201>
- 921 Weiss, T., Taschner-Mandl, S., Ambros, P. F., & Ambros, I. M. (2018). Detailed Protocols for  
922 the Isolation, Culture, Enrichment and Immunostaining of Primary Human Schwann  
923 Cells. *Methods in Molecular Biology (Clifton, N.J.)*, *1739*, 67–86.  
924 [https://doi.org/10.1007/978-1-4939-7649-2\\_5](https://doi.org/10.1007/978-1-4939-7649-2_5)
- 925 Weiss, T., Taschner-Mandl, S., Bileck, A., Slany, A., Kromp, F., Rifatbegovic, F., ... Ambros, I. M.  
926 (2016). Proteomics and transcriptomics of peripheral nerve tissue and cells unravel new  
927 aspects of the human Schwann cell repair phenotype. *GLIA*, *64*(12), 2133–2153.  
928 <https://doi.org/10.1002/glia.23045>
- 929 Weiss, T., Taschner-Mandl, S., Janker, L., Bileck, A., Rifatbegovic, F., Kromp, F., ... Ambros, I. M.  
930 (2021). Schwann cell plasticity regulates neuroblastic tumor cell differentiation via  
931 epidermal growth factor-like protein 8. *Nature Communications*, *12*(1), 1624.  
932 <https://doi.org/10.1038/s41467-021-21859-0>
- 933 Wekerle, H., Schwab, M., Linington, C., & Meyermann, R. (1986). Antigen presentation in the  
934 peripheral nervous system: Schwann cells present endogenous myelin autoantigens to  
935 lymphocytes. *European Journal of Immunology*, *16*(12), 1551–1557.  
936 <https://doi.org/10.1002/eji.1830161214>
- 937 Yao, K., Graham, J., Akahata, Y., Oh, U., & Jacobson, S. (2010). Mechanism of

938 neuroinflammation: enhanced cytotoxicity and IL-17 production via CD46 binding.  
939 *Journal of Neuroimmune Pharmacology : The Official Journal of the Society on*  
940 *NeuroImmune Pharmacology*, 5(3), 469–478. [https://doi.org/10.1007/s11481-010-9232-](https://doi.org/10.1007/s11481-010-9232-9)  
941 9  
942 Ydens, E., Cauwels, A., Asselbergh, B., Goethals, S., Peeraer, L., Lornet, G., ... Janssens, S.  
943 (2012). Acute injury in the peripheral nervous system triggers an alternative macrophage  
944 response. *Journal of Neuroinflammation*, 9, 176. [https://doi.org/10.1186/1742-2094-9-](https://doi.org/10.1186/1742-2094-9-176)  
945 176  
946 Ydens, E., Lornet, G., Smits, V., Goethals, S., Timmerman, V., & Janssens, S. (2013). The  
947 neuroinflammatory role of Schwann cells in disease. *Neurobiology of Disease*, 55, 95–  
948 103. <https://doi.org/10.1016/j.nbd.2013.03.005>  
949 Zhang, S. H., Shurin, G. V., Khosravi, H., Kazi, R., Kruglov, O., Shurin, M. R., & Bunimovich, Y. L.  
950 (2020). Immunomodulation by Schwann cells in disease. *Cancer Immunology,*  
951 *Immunotherapy : CII*, 69(2), 245–253. <https://doi.org/10.1007/s00262-019-02424-7>  
952

## 953 Supplementary Figures

### Supplementary Fig1

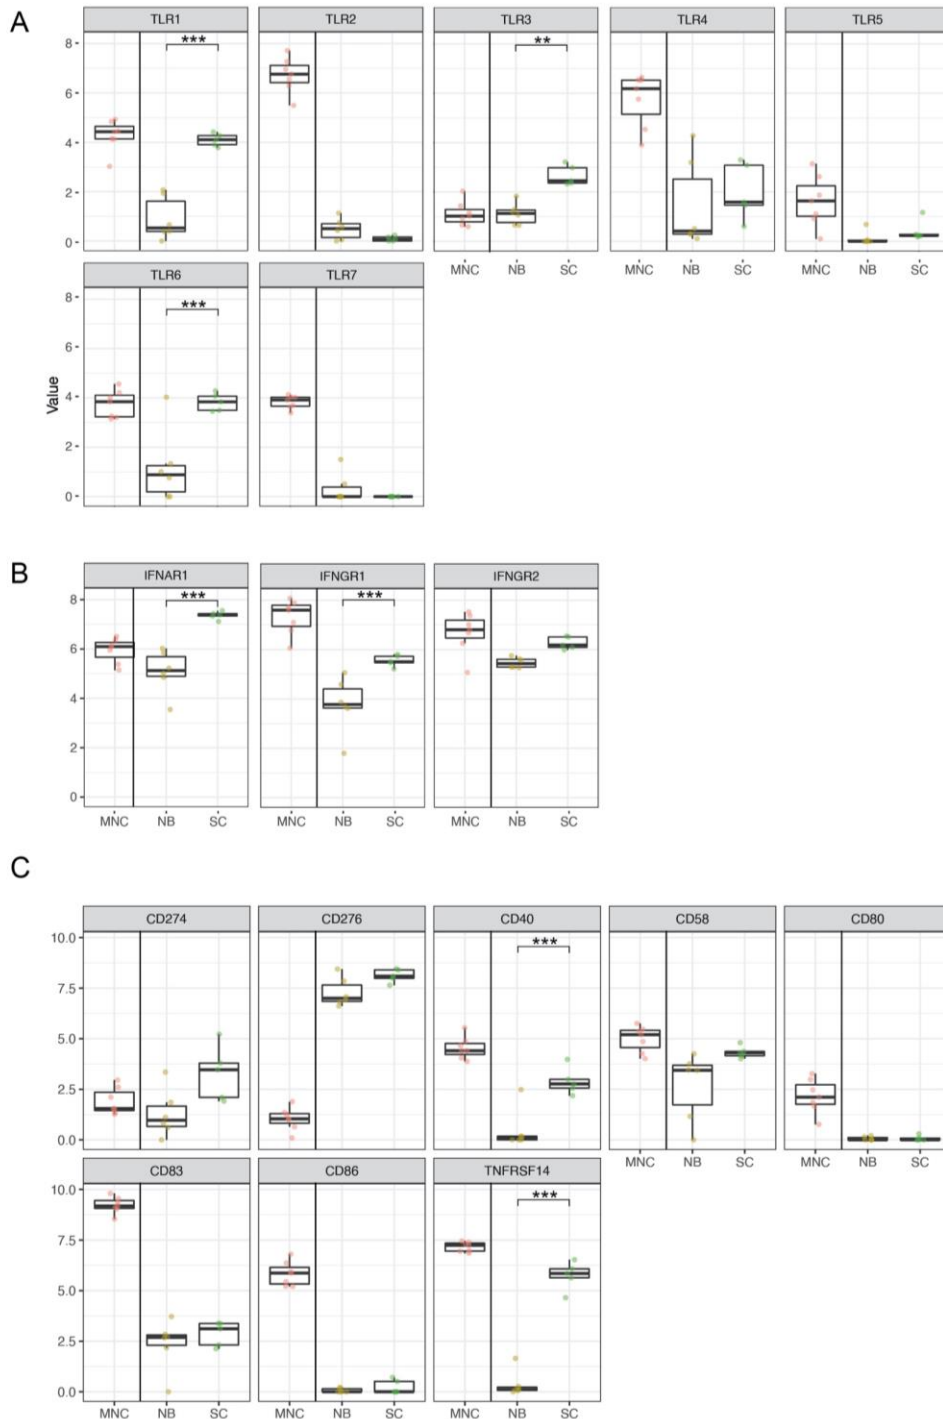

954  
955  
956  
957  
958  
959

Supplementary Figure 1 | mRNA expression of Toll-like receptors, interferon receptors and co-signaling molecules. Boxplots show mRNA levels (RPKM) in hrSCs (n=5) versus NB cells (n=5). MNCs are shown as reference. (A) Toll-like receptors (B) interferon receptors and (C) co-stimulatory and -inhibitory molecules. Boxes contain 50% of data and whiskers the upper and lower 25% means are displayed as black horizontal lines.

## Supplementary Figure 2 Berner, Weiss et al, 2021

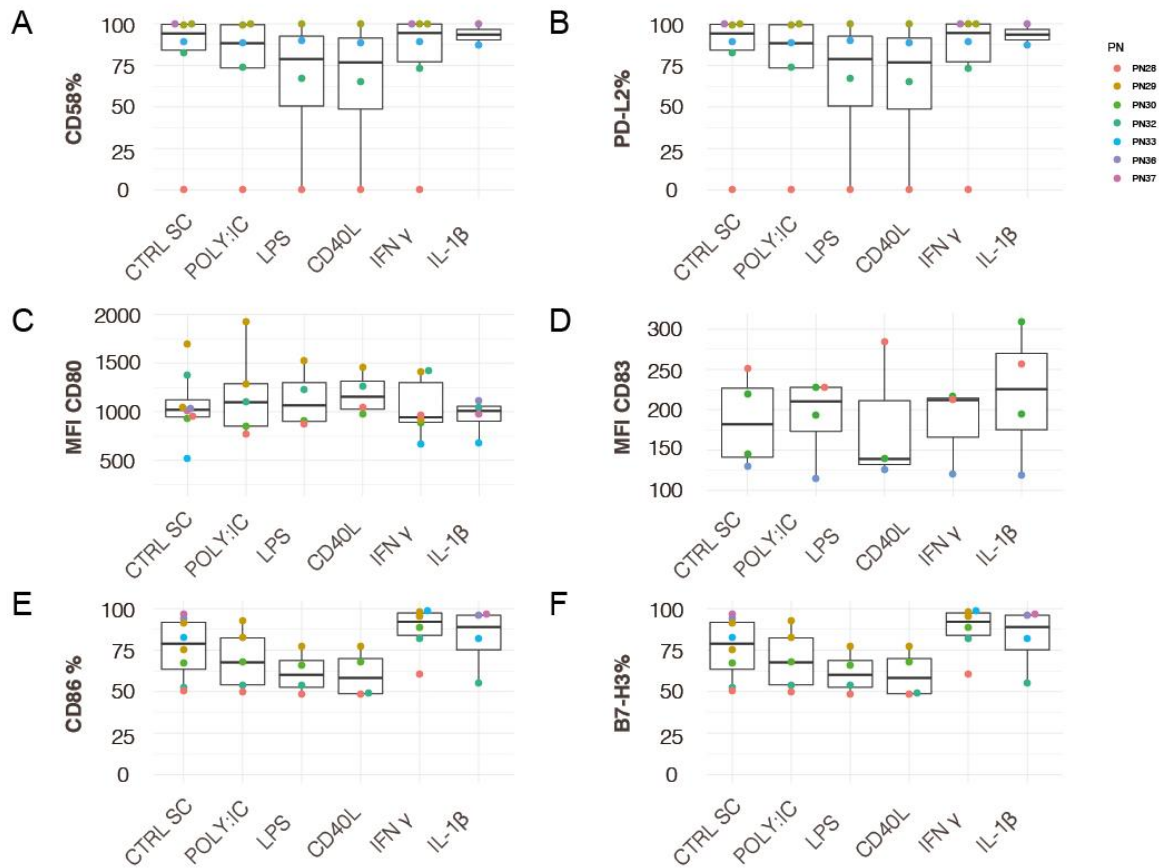

960  
961  
962  
963  
964  
965  
966  
967  
968  
969

Supplementary Figure 2 | Flow cytometry-based phenotyping of MHCII and co-signaling molecules upon inflammatory stimulation. Box plots show the expression status of CD58 (A), PDL2 (B), CD80 (C), CD83 (D), CD86 (E) and B7H3 (F) of S100 positive hrSCs after stimulation with POLY:IC, LPS, CD40L, IFN $\gamma$  and IL-1 $\beta$ ; n=9; technical replicates (same color); biological replicates (different color). Each biological replicate is conducted with hrSCs isolated from a different donor nerve. (A, B, E, F) Boxplots represent the percentage of positive cells based on gates set in relation to unstained controls. (C, D) Boxplots represent the mean fluorescence intensity (MFI). Boxes contain 50% of data and whiskers the upper and lower 25%; means are displayed as black horizontal lines. A two-way ANOVA using a post-hoc Holm p value correction was performed; \* p  $\leq$  0.05; \*\* p  $\leq$  0.01; \*\*\* p  $\leq$  0.001.

## 970 Supplementary Tables

971

| 1 <sup>st</sup> antibodies |         |            |                 |          | Application    |  |
|----------------------------|---------|------------|-----------------|----------|----------------|--|
| Antigen                    | Species | catalog No | company         | dilution | comment        |  |
| S100                       | rabbit  | #Z0311     | DAKO            | 1:200    | 1 hr, RT, perm |  |
| vimentin                   | chicken | #AB5733    | Merck Millipore | 1:200    | 1 hr, RT, perm |  |
| NGFR                       | rabbit  | #8238S     | CellSignaling   | 1:300    | o.n., 4°C      |  |
| PD-L1                      | Mouse   | #4274539   | eBioscience     | 1:50     | o.n. 4°C       |  |
| HLA-DR-α1                  | mouse   | #M0746     | DAKO            | 1:50     | o.n., 4°C      |  |

| 2 <sup>nd</sup> antibodies |         |            |           |          | Application |  |
|----------------------------|---------|------------|-----------|----------|-------------|--|
| Antigen                    | Species | catalog No | company   | dilution | comment     |  |
| α rb FITC                  | swine   | #F0205     | DAKO      | 1:50     | 1 hr, RT    |  |
| α ch AF647                 | goat    | #SA5-10073 | LifeTech. | 1:300    | 1 hr, RT    |  |
| α ms AF594                 | goat    | #A11032    | LifeTech. | 1:300    | 1 hr, RT    |  |

| directly labelled antibodies |         |            |               |          | Application       |  |
|------------------------------|---------|------------|---------------|----------|-------------------|--|
| Antigen                      | Species | catalog No | company       | dilution | comment           |  |
| S100B-FITC*                  | rabbit  | #Z0311     | DAKO          | 1:50     | 20 min, 4°C, perm |  |
| CD80-PerCP-eF710             | mouse   | 46-0809-42 | eBioscience   | 1:25     |                   |  |
| CD276(B7-H3)-PE              | mouse   | 565829     | BD Bioscience | 1:50     |                   |  |
| CD40-PerCP                   | mouse   | Ab91282    | Abcam         | 1:5      |                   |  |
| MHCII-APC-ef780              | mouse   | 47-9956-42 | eBioscience   | 1:50     |                   |  |
| PD-L1-PE                     | mouse   | 557924     | BD Bioscience | 1:5      |                   |  |
| HVEM-A647                    | mouse   | 564411     | BD Bioscience | 1:25     |                   |  |
| CD86-APC                     | mouse   | 555660     | BD Bioscience | 1:25     |                   |  |
| CD273- PE                    | mouse   | 565829     | BD Bioscience | 1:25     |                   |  |
| CD58-APC                     | mouse   | 17-0578-41 | eBioscience   | 1:25     |                   |  |

972

973 **Supplementary Table 1 | List of antibodies.**

974 perm = permeabilization necessary, RT = room temperature.

975

976 **Supplementary Table 2 | RNA-sequencing. Differential gene expression analysis of hrSCs compared to**

977 **NB cell lines.**

978 Supplementary Table 3 | RNA-sequencing. GO functional annotation of top 250 genes upregulated in  
979 hrSCs versus NB cell lines.

980

981 Supplementary Table 4 | RNA-sequencing. Gene set enrichment analysis (GSEA) in hrSC versus NB cell  
982 lines.

983

984 Supplementary Table 5 | Protein array. Differential protein secretion of hrSCs versus NB cell lines.
